# Supplementary material for: A Genome-Wide Analysis of Serine Protease Inhibitors in Cydia pomonella Provides Insights into Their Evolution and Expression Pattern
Source: MDPI journal article supplement (doi:10.3390/ijms242216349), 2023-11-15
Supplement: s1 [file s1]

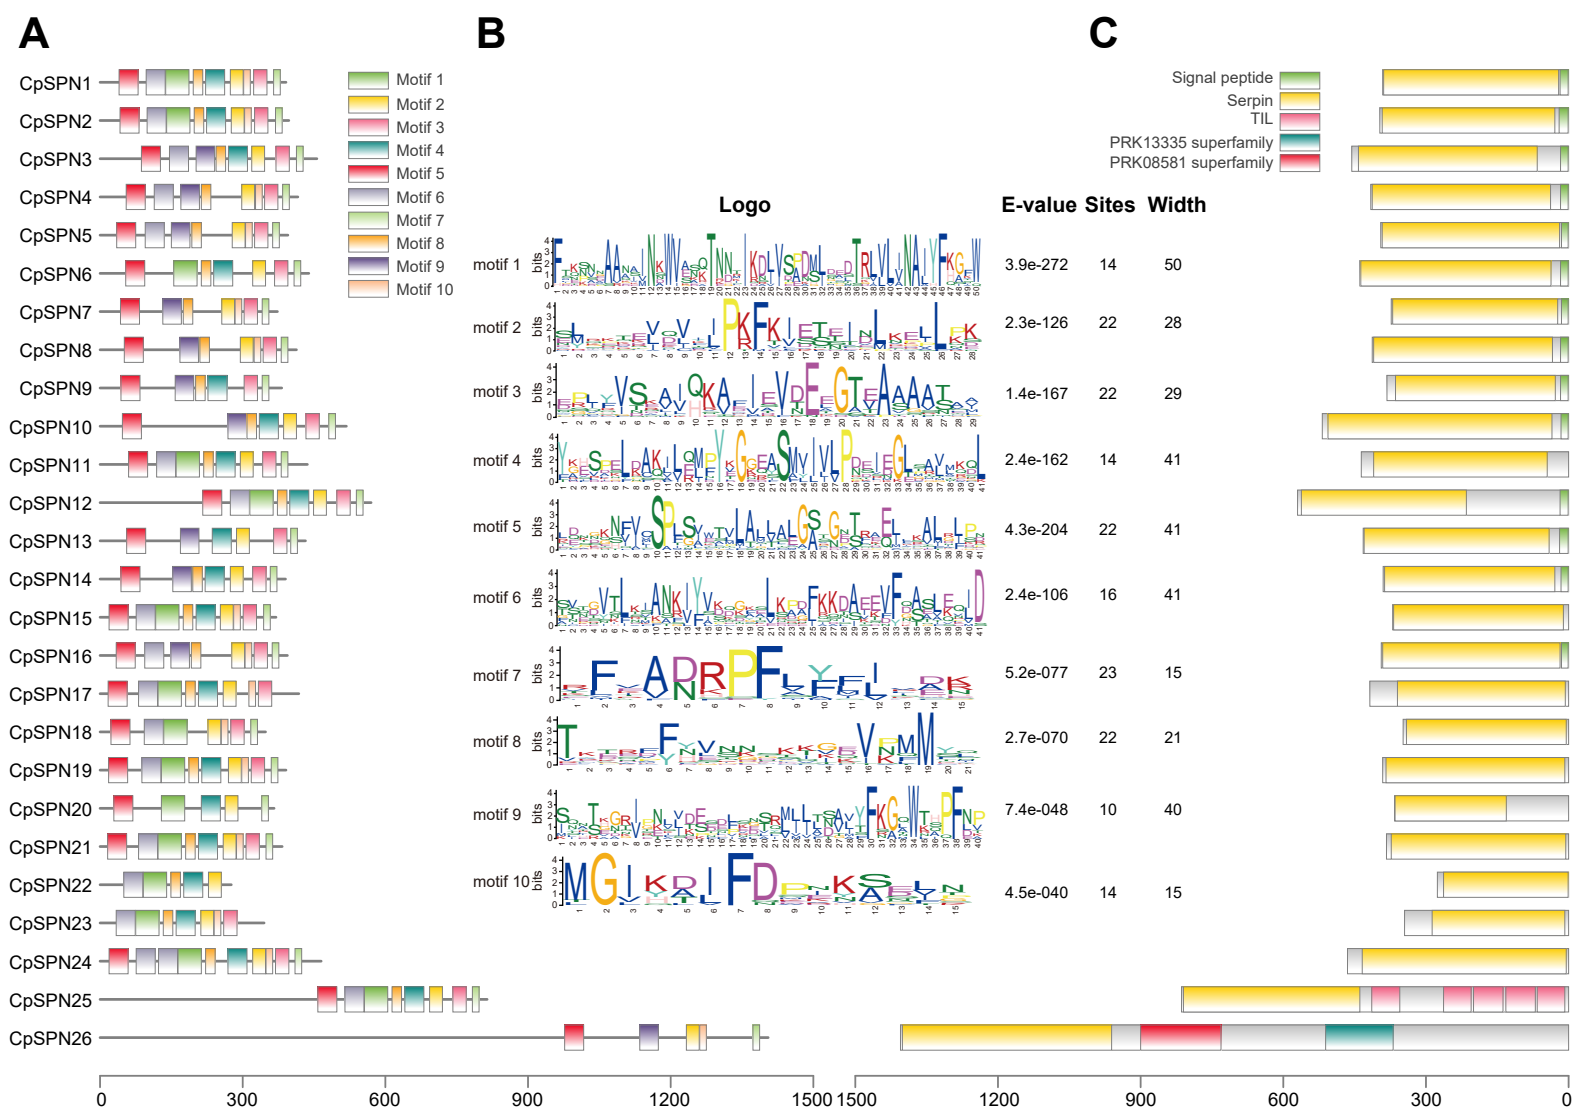

**Figure S2** Conserved motifs and domain structure of serpin genes in the codling moth. **(A)** Distribution of conserved motifs in 26 codling moth serpins. The distribution plot of conserved motifs was created using TBtools-II (<https://github.com/CJ-Chen/TBtools-II>). **(B)** Logos of ten conserved motifs identified within codling moth serpins. Conserved motifs were predicted using MEME suite 5.5.4 (<https://meme-suite.org/meme/tools/meme>). **(C)** Domain structure of 26 serpin genes in the codling moth. Conserved domains were predicted using the online CD-search tool (<https://www.ncbi.nlm.nih.gov/Structure/cdd/wrpsb.cgi>).
