# Supplementary material for: A Genome-Wide Analysis of Serine Protease Inhibitors in Cydia pomonella Provides Insights into Their Evolution and Expression Pattern
Source: MDPI journal article supplement (doi:10.3390/ijms242216349), 2023-11-15
Supplement: s1 [file s1]

hA

```
MsSPN1K : -----MAGETDLQKILRESNDQETAQMFSEVVKA--N-----
CpSPN1  : -----MNTLIFFTAVVAMASATGEEKILNDGNNVFTANMFSEVVKE--Q-----
CpSPN2  : -----MSTFLLTFLFFIFSTNQISSSTNMDSA AVSSAVAKFSMQFCNELDKS-----
CpSPN3  : -----AAQPGKPTLGTNETLVDHDYWDSDDYVQSPADYDSFDWTVTKRIAAY-----
CpSPN4  : -----FGQNQGIKGHDEPEYPTNLHNGLSEATGNFSVELLYHAAKK--Q-----
CpSPN5  : -----MRFTVLILLTSSCYCDVEFSEPRNFSIELLYHTQK--Q-----
CpSPN6  : -----VTGQCFYKDDSAKKLDPEARTSLYRGQLEFTLNLFNSINDA--Y-----
CpSPN7  : -----MWKVIIAACTSLVVTAPVDDRVDSPINQFALRLLDNAYAFQEN-----
CpSPN8  : -----LGQNHGVKEPVYRMNLAKFSESTGNFTIELLYHVAKR--Q-----
CpSPN9  : -----ATYLYLLAIFLPPILGQCSVEKAGHSFSRAVYEFSLDLIQRVGQ--E-----
CpSPN10 : -----VLCLAVGLSSARWVRRGRAPPKTTGFVGEATNQLSTAIFQGYID-----
CpSPN11 : -----FLAYLQSLECIDNKRPNARLNYFDTDLLKYTTE--D-----
CpSPN12 : -----VVPVSQSSQLLNMTNDIKLASAVISHVGIEMMK SAR-----E-----
CpSPN13 : -----AISEHEENTTDPSVTDQPHEQQLSNTINELGFKLLTEEMKR--Y-----
CpSPN14 : -----NCDERSVTAYYKKPIYEFSTGLLDRVSQ--E-----
CpSPN15 : -----MDPKLSLSLWNFAARFCNELEKG-----
CpSPN16 : -----MKTIVFLLFVATCYAEFEFSARSRNFSIELLHHTQKQ-----
CpSPN17 : -----MTSISHVANFGARFCNELDNS-----
CpSPN18 : -----MVKWGRRNKVVQFLGTLSEMPYEL--D-----
CpSPN19 : -----MTLHVNHVANFAARFCNELDSE-----
CpSPN20 : -----MFRKTLDQVERKFLLSAFNKLTAISPDNRKE-----
CpSPN21 : -----MTSIHVANFGARFCNELDKN-----
CpSPN22 : -----
CpSPN23 : -----
CpSPN24 : -----MEPSLAASLSHFAARFANELEKG-----
CpSPN25 : -----TPTTTVKPPTISTGDRGSGLAGVLDGITAFTGKCLYERMQS--A-----
CpSPN26 : DNFVKISTINPHQQNNNPPLKVKETINKVSNPVSKTTVGLETTTSTSTETPMDPILSESMDDL LSQVVNQAPQSI VDS ENKLQESNVISTAENFVDTTTVVI
```

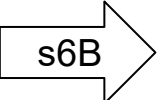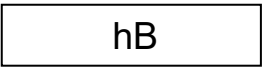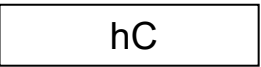

|         |   |               |                   |                                        |                                  |                           |                         |        |
|---------|---|---------------|-------------------|----------------------------------------|----------------------------------|---------------------------|-------------------------|--------|
| MsSPN1K | : | -----PG-QNVVL | SAF               | S                                      | SVLPPLGQLALAS-VGESHDELLRAL       | LALP-N                    |                         |        |
| CpSPN1  | : | -----AG-KSVVM | SAF               | S                                      | SVLQPLAQLALAS-VGESHDELLRAIGLP-N  |                           |                         |        |
| CpSPN2  | : | -----QNVVS    | SPL               | S                                      | SAEILLALLSLGS-SEPALPELLGAIGFQ-D  |                           |                         |        |
| CpSPN3  | : | -----SE-ENFLL | SPL               | S                                      | GLKLALAILTEAA-TGPTQAQLASV        | LGFQDVN                   |                         |        |
| CpSPN4  | : | -----GK-QNLIL | SP                | S                                      | ITAWTVLAVTSEGA-LGNTRTQLVSAL      | RIKRN                     |                         |        |
| CpSPN5  | : | -----TG-GHVVI | SP                | S                                      | FGIWTLMTGLAVGA-TGDSFEQIRVAFILPRS |                           |                         |        |
| CpSPN6  | : | -----PT-DNIFF | SP                | S                                      | FVYHSLLLAYFSA-GGQTEASLKES        | LQIE-K                    |                         |        |
| CpSPN7  | : | -----FGRQN    | FAI               | SPL                                    | S                                | VWSVFSLLAEGS-AGDTFQELMKEL | QLPQD                   |        |
| CpSPN8  | : | -----PD-QNFVV | SP                | S                                      | FAAWTMLAVTYEGA-VGNTNEELILAL      | RFPRK                     |                         |        |
| CpSPN9  | : | -----ND-NHFVT | SP                | S                                      | FLWTVLTTASLGA-EDETTLAEMKRV       | LRLH-H                    |                         |        |
| CpSPN10 | : | -----DN-KNIAF | SP                | S                                      | LGYSAILAILAEGA-TGQTREQLVSAL      | HLPEN                     |                         |        |
| CpSPN11 | : | -----RS-GNVVV | SP                | S                                      | ASIKSTLAMLLAEGA-SGNTEVEIRCS      | LRLSPN                    |                         |        |
| CpSPN12 | : | -----NH-SNVVV | SP                | S                                      | TSVVNMLALLQAGA-TGVTQEQVSNA       | LRLS-P                    |                         |        |
| CpSPN13 | : | -----AD-TNIVM | SP                | S                                      | TGIAGLLAMVLLGS-AGNTYTELAAAL      | LGFSQD                    |                         |        |
| CpSPN14 | : | -----TD-GHFVC | SP                | S                                      | INPWLQLVNLAQGA-HGATLKQIWKVT      | GHGKP                     |                         |        |
| CpSPN15 | : | -----KSQVC    | SPL               | S                                      | LAQAVLALTALGS-GGDTRKELLQAM       | ALP-D                     |                         |        |
| CpSPN16 | : | -----TG-GHVVI | SP                | S                                      | FGIWTLMTGVALGA-TGNSFAELQRA       | FILPRS                    |                         |        |
| CpSPN17 | : | -----KNFIC    | SPL               | S                                      | SVETVLALVALGS-SNESRAEIFKAL       | DIP-N                     |                         |        |
| CpSPN18 | : | -----SN-KNFIC | SPL               | S                                      | SVETVLALVALGS-RNDSREEIFKAL       | DIP-N                     |                         |        |
| CpSPN19 | : | -----KTFIC    | SPL               | S                                      | SVETVLALVALGS-SNESRAEIFKAL       | DIP-N                     |                         |        |
| CpSPN20 | : | -----NG-ISFLQ | SGL               | S                                      | FLYHLLMSLSLTM-DQNAVREIEEY        | FGLNMS                    |                         |        |
| CpSPN21 | : | -----KNFIC    | SPL               | S                                      | SVETVLALVALGS-SNESRAEIFKAL       | NIP-N                     |                         |        |
| CpSPN22 | : | -----MSAMS    | S                 | S                                      | VFTPIAELCLYTEDGPAFDQCIKI         | LNLK-D                    |                         |        |
| CpSPN23 | : | -----MSF      |                   |                                        | -----CSAGKQDL                    | -----                     |                         |        |
| CpSPN24 | : | -----KSQVC    | SPL               | S                                      | LAQAVLALTALGS-GGDTRKELLEAM       | ALS-D                     |                         |        |
| CpSPN25 | : | -----PN-ENIIM | SAMS              | S                                      | VFTPIAQLCLYS-NGPAFDQCIKT         | LNLK-D                    |                         |        |
| CpSPN26 | : | KFKTDGNNPESPD | KDIVLDVSKENQGLEVT | TKDLSDDVAQFTELCNELAFRYWNAIAETIPNKRSFIL | SP                               | S                         | ITSMLAMFMGA-RGATSGEMNEI | LKLD-D |

|         | hD                                                                                                 | s2A | hE | s1A |
|---------|----------------------------------------------------------------------------------------------------|-----|----|-----|
| MsSPN1K | : --DNVTKDVFADLNRGVRA-----VKGVDLKMASK-IYVAKG-LELNDDFAAVSRDVFVGSEV-----                             |     |    |     |
| CpSPN1  | : --DNVTKAVFPKVTAQLRA-----VQGVKLNMANI-IYIPTN-AQVKEDFAALSKSVFGSEF-----                              |     |    |     |
| CpSPN2  | : --TDAIRSSFSLVSSRLKS-----VKGVTLDVANR-VYLQQG-HELDPKLKDDAVKVFDAGL-----                              |     |    |     |
| CpSPN3  | : --RTVVRTKFSSIISSLQLA-----NPNYTLNVGSR-IYVDST-VSERQRFSSIAEEFYKTEL-----                             |     |    |     |
| CpSPN4  | : --RTVTRHDFQEIARWLNVN-----TTTVHLAKFNG-IFVDKS-KSLEDDFRQSSKTFYDTQT-----                             |     |    |     |
| CpSPN5  | : --LKTVVCGSKHLSKSVLKRT-----SDGVSITSKNF-LFADDD-FLLKPAFKQTITEDFDATV-----                            |     |    |     |
| CpSPN6  | : --SLDKINLISAYKVDRRSRLTNNN-----SASYEFNSANK-MFIDET-LDVRQCL----LDIFEDEL-----                        |     |    |     |
| CpSPN7  | : --LRATQELHLAADSVLRSN-----DPDLVIHKQAA-LFPECS-LEIHQEFC-----                                        |     |    |     |
| CpSPN8  | : SPRTTVRYYYQEIAQWLNVN-----RTTAQFTKFSG-IFMDRVWTGMDNDFRHIAEEIYNTEA-----                             |     |    |     |
| CpSPN9  | : --YPCFNDRYLEIVKGITVY-----NSKTTLERSV-SLFVDKT-VSLLESFHRKLSGTGVCDV-----                             |     |    |     |
| CpSPN10 | : --PNLIRKTYRYIMERLKNTH-----YKYNQPELKNY-FYIYKN-YTINDDYKKILEDYLLTDVRSVERYNDVDHFKPDESNDDEETIEISDKKAA |     |    |     |
| CpSPN11 | : --KNEFREQLNIYLSALQCN-----NTAAKLQNANG-VFVSNK-LILKKEYERVIEKVYLTKV-----                             |     |    |     |
| CpSPN12 | : --EKSA-EAFRLMNTLRLRS-----TERNILRSASS-IFAADS-FELSRDFKNIAIQNFGSEV-----                             |     |    |     |
| CpSPN13 | : --ILRNRAHHEQFGSLLQ-----LLNSSTTYADA-ILVEPR-TRIRPLYREFLQRVYQGDA-----                               |     |    |     |
| CpSPN14 | : CMQRTLRLKTLNSLY-----GEGKDYKCQSL-VIIDKY-LAVKNYFKRRVERSRTVKV-----                                  |     |    |     |
| CpSPN15 | : --DEAIRSLFGYLTSTLNS-----IQTVKLRFANR-IYVSKH-GTLKPGIQKDSVEVFGSSL-----                              |     |    |     |
| CpSPN16 | : --KKTVIAGYKELTKAVLNPS-----TNGVSLTSKNF-VFIDDD-FTLNPDFRKTISTDFDATI-----                            |     |    |     |
| CpSPN17 | : --EDDLFSTFISLTTTLASKPSKHKT-----SNDVTLKIANI-IYVKQG-AALKAALKKNAAEEVFQASL-----                      |     |    |     |
| CpSPN18 | : --EDNLRVFTSVTQNLKKPFIESLTSKLNPFNRDSTLQIATK-IYVKCG-KSVKPELKKDAEKVFNSSL-----                       |     |    |     |
| CpSPN19 | : --EDNLRVFTSLTQNLKKPFIEITISILKPFSQEYTLKIANI-IYVKQG-KDLKSNFKKDAEKVFNASL-----                       |     |    |     |
| CpSPN20 | : --EADKIEILERTVSWLPKS-----SEELKFRWSSR-LVLQR--VAAGNGLHGAAARVLPLRL-----                             |     |    |     |
| CpSPN21 | : --EDNLFSTFTSLTATLASKDPSEFKT-----CEDVTLKIANI-IYVKHG-GALKAALKKKDAEEVFQASL-----                     |     |    |     |
| CpSPN22 | : --KKDIRDTFANFSSLYEG-----VTSVNFSTAAK-VYSSEK-YELSAGFIKDAIEVFHAAA-----                              |     |    |     |
| CpSPN23 | : --RRLLFSTFISLTTTLASKPSKHKT-----SNDVTLKIANI-IYVKQG-AALKAALKKNAAEEVFQASL-----                      |     |    |     |
| CpSPN24 | : --DEALRSLFSYVTSTTKS-----VEGITLKMANK-VYVTNK-SKLQPDIQKDAEEVFQSAL-----                              |     |    |     |
| CpSPN25 | : --KQDIRDTFENFSSLYEG-----VTSVNFSTAAK-VYSSDK-YQLSDGFKKDAIDVFHAAA-----                              |     |    |     |
| CpSPN26 | : MVTFNPHFTLKNISDSIETTP-----ESGVAISAFIRELYSDRNKGQILTFYKERAQHFNHGHV-----                            |     |    |     |

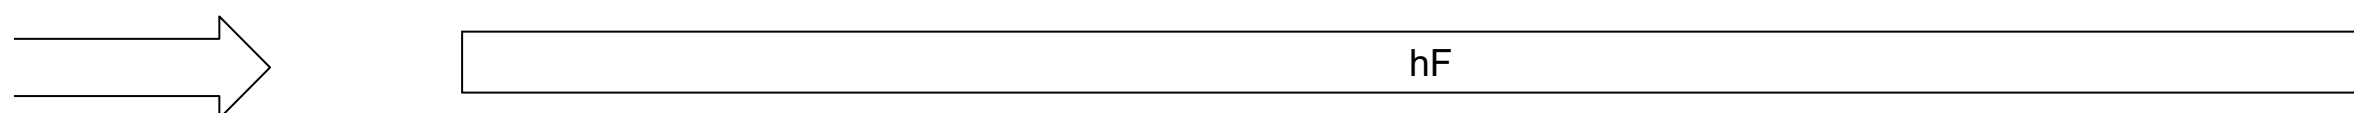

```
MsSPN1K : -----QNVDFVKSVEAA-----GAINKW-----VEDQTNNRIKNLVD
CpSPN1  : -----KNIDFTKNVPAA-----QEINSW-----VEDHTNHKIKDLVD
CpSPN2  : -----EPMDFSNGAVAA-----KVINDW-----VESKTNNKIKDLIS
CpSPN3  : -----KKVDFRLPAETA-----AQINGW-----VSNLTHGNIIPNLID
CpSPN4  : -----VDLDFKNSAATA-----ATINGA-----VSTATKGRIPKLVD
CpSPN5  : -----KVLDFKDSNEAA-----AKANNF-----IQNSGARVTNVLT
CpSPN6  : -----ERLNFHETPSEA-----R-----EHINKW-----VAAATKNHIQALIP
CpSPN7  : -----QAANMY-----RTEGQIRNAVK
CpSPN8  : -----VDLPFKNKAAAA-----TINRA-----VSLTTEDRIPTLID
CpSPN9  : -----MILPFDNYNNVA-----TTINNY-----VSQATHNTIQEIVN
CpSPN10 : ESNKNEEIVDLVPPKESG-----EKFISFAVEDKPEKVDISQIEYKPAKNIKEKIKLVKTYPKKDDSGEEEEETMVAVEARNHARSHHHVLQE
CpSPN11 : -----VILNFLDPVGSA-----AIVNDW-----VGNQTRGLIRSLIE
CpSPN12 : -----SRISFDNPNAAG-----QKINSW-----IASKTNDQIDRLVS
CpSPN13 : -----RAVEFTDAPLAR-----DTVNDW-----IKNHTKGKIEEFLK
CpSPN14 : -----ASLDRDTPYDSA-----DEASEI-----IERATG--VGNSID
CpSPN15 : -----QQVDFMEKEGAA-----DSINKW-----VAAKTNNMIRNIVS
CpSPN16 : -----KVLDFKNPDLAA-----GKANNF-----IQNSGGRVSNVLT
CpSPN17 : -----EQIDFTQSNNAAG-----NAINKW-----VSNQTNNTIKDIVS
CpSPN18 : -----EQIDFVKSSDAA-----NSINNW-----VKKRTNNI IKDLVS
CpSPN19 : -----ELIDFGKNDDAA-----NSINNW-----VAKQTNDI IKDIVS
CpSPN20 : -----SWLVGNETSTQLA-----ETLNSM-----VLSDSGGSMHDTFS
CpSPN21 : -----EQIDFTQSNNAAG-----NAINKW-----VSNQTNNTIKDIVS
CpSPN22 : -----QNLDFSKNVEAA-----AIMNAW-----VESQTNNRIKNLVT
CpSPN23 : -----EQIDFTQSNNAAG-----NAINKW-----VSNQTNNTIKDIVS
CpSPN24 : -----EQLDFTESAAAAGAVNKWMANKVYVTNKS KLQPD IQKDAEEVFQSALEQLDFTENAAAVGAVNKW-----VAEQTEDMIKDVVD
CpSPN25 : -----QEIDFIKKNQAA-----AIMNAW-----VESKTNNRIKDLVS
CpSPN26 : -----EEINFKLISDII-----R-----RRTNLL-----VKRYTWGKIIEYMK
```

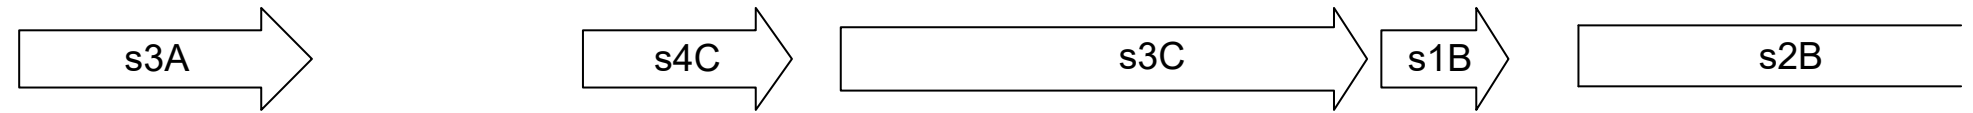

```

MsSPN1K : PDAL-----DETTRSVLVNAIYFKGSWKDKFNKERTMDRDFHVS KD KTI-KV----PTMIGKKD-VRYADVPELDAKM-----
CpSPN1  : PNSL-----GADTRAVLVNALYFKGSWEKKFNDKATTDSDFHVTKDKTV-KV----PTMYKKDD-FKYAESKELDAKL-----
CpSPN2  : EDSL-----NALTRLVLVNALYFKGKWKHQFKPHNTMDKPFYVKKD TTV-DV----PMMYIEEQ-FRYGESDKLNAQL-----
CpSPN3  : EDEV-----KGSIVLVLTTLFFKGTWKHQFNPNTTKTRAFYVTP TVQK-QV----PFMNVKDK-FYYAESAKYDAKI-----
CpSPN4  : ESNL-----SDAQMIITS AVYFKGQWTAPFNVSSSTKQNFYNSSGMKIGEV----NMMYNRYT-YPFANIKEIQARV-----
CpSPN5  : SEDF-----EQSRMILTNVITFKGLWTSPFNASH TTLEYFYNENKEIIGEV----NMMHQKGE-FPLSNIIDLKSFV-----
CpSPN6  : EDGI-----THTTKLVLANAAYFKGVWASKFPAERTKKEAFFVSETLQT-LV----PFMKQKGT-FHFMVSEDLGAQI-----
CpSPN7  : EEFL-----RDLRLLIVDALYFKANWTHPFDPTATREEDFYNGQGKTIGRV----NMMFHKAS-HNVGDSNSIGAQI-----
CpSPN8  : ESHL-----NNTQLIIASAVYFNGQWTAPFNV-ITVKRDFYNSIGEKIGEV----NMMYNRYT-YPFANISELQASV-----
CpSPN9  : SNDI-----EGVYLLLLDAVYFKGMWNIPFEPSETEVTSFYDERNNPVGDV----NMMFSMRQ-YNLASIDQLQAKV-----
CpSPN10 : KSDIASSISVNTVVGKKSEKTSPSNSLMLIFNGMYFRGAWKQPF--LKVEPAMFYTSNSEKK-QV----QMMCTKGI-FKTGSLPGLDSSA-----
CpSPN11 : PAHI-----PPSSDVLVIN ALYFKSAWQHAFDRSLTRSACFRVQGACKK-QV----AMMEISTE-LNYAFVDNLRAHA-----
CpSPN12 : PDSI-----GVNTQLVLN A IYFKGIWETMFKPSETSLQDENLSNGSKK-SV----PFMTLRSG-FRAGVDKANKALV-----
CpSPN13 : EPL-----PVETRVVLLSALYFSGQWTHPFLPEHTKKMAFK-TPTGDV-MA----DMMLNFGH-FQYTYS AEDGVQM-----
CpSPN14 : PFEF-----KLTSLMLADVATFKAAWRQPFDPGFTAVQPFYHGNVKLG-EV----NMMSSIGY-FNYINLTAINAEV-----
CpSPN15 : PNSL-----HYATRLLL VNAIYFQGTWEKPF EKDLTKERIFHVNNRDTV-EV----PMMFMDEEYFRYRHSLELKAQL-----
CpSPN16 : SDDF-----AESRMILTNVISFKGLWLSPFNTSETTVENFYNNENNDVVGVQV----NMMYQRAE-FPFSNIVELKAFV-----
CpSPN17 : ADML-----DEDTRLVLINAIYFHAFWEYQFDADDTYTRVFHVNKSKKI-DI----KQMSLMGKPFNYKHSPELKAKI-----
CpSPN18 : ADML-----DGD TGLVLVNAIH FH-----I-----
CpSPN19 : ADML-----MQDTRVVLVNAIYFHGFWEIPFKANATFTEKFQVNRTKSV-NV----KMMTLEGPSFNYKHSPELQAKI-----
CpSPN20 : EE EV-----EAGVCAAALGTVYLRGTWRTA-PTLLNDTL PFRDSPAAPN-RS----SRYFRLNDLMAYSYLHEWDTEA-----
CpSPN21 : ADML-----DEDTRLVLINAIYFHAFWEYRFDADDTCTRVFHVNN SKKI-DI----KQMSLMGKPFNYKHSPELKAKI-----
CpSPN22 : PDMI-----SALTRLVLINAIYFKGNWLYRFNETNTKEEDFYLS DGSTA-KV----KLMYQEINDLEYGEVPSLDCKV-----
CpSPN23 : ADML-----DEDTRLVLINAIYFHAFWEYQFDADDTYTRVFHVNKSKKI-DI----KQMSLMGKPFNYKHSPELKAKI-----
CpSPN24 : AKSL-----NSDTRLLLINAIYFQGFWE TPFRTRATRDRPFHVDLNTQI-KV----PMMSMHDVHFYRKHSP ELKAQLIVKKILGLVFDI
CpSPN25 : PDML-----SESTRIVLINAIYFKGKWLKQFNENDTKKEDFYLS DGSTT-KT----KLMYQEIKDLEYGEDASLDCKV-----
CpSPN26 : ANTI-----TMQPPLAA FSTNIFETDCTGSSVEGRDGEMYFVVSPNVRQRRLLVPVPAVLYKKG--FLAGYDPVL DATA-----

```

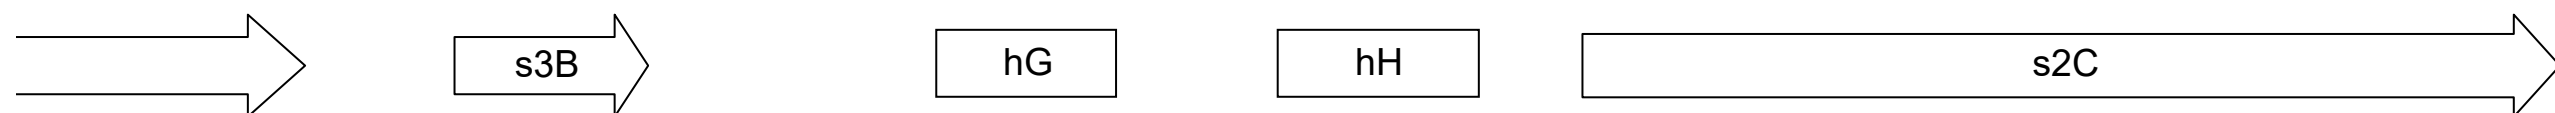

```

MsSPN1K : -----IEMSY-EGDQASMIILP--NQVDG----ITALEQKL-KDPKA---LSRAEERLYNT-----EVEIYLPK
CpSPN1  : -----LELPY-EGKEASFLIVLP--NEIDG----LPALQEKL-KNPTA---LDKAVAEMREV-----EVNVYLPK
CpSPN2  : -----LEMPY-EGDEASMVIVLP--KDIEG----LDTVLKQL-ASGVD---LVQELNNMIST-----KVQVTVPK
CpSPN3  : -----LRMPY-LGKKFSMYIVVP--NSLKG----LPRVMDSL----SD---LRTEMLYLAER-----TVDVTLPK
CpSPN4  : -----IELPYGVENRLSMLLMIP--NPGVT----LEDMFLNF--KKVP---LDTV FQELKLS-----QEEYSDD EIDCFIPR
CpSPN5  : -----CELT YGTDAAYSMLVILP--HPGVK----VEDVYKKF--ENIT---IPDIIARLQND-----EKEYGLDEVEIKLPR
CpSPN6  : -----LELPY-KGNDISMYILLP PYSMKED---MTNRCKPY--GEFA---WPYSMQNLLVSD FHRCEEHHSQPDTPARLA AVVEESYMGREVIVEIPK
CpSPN7  : -----LEMTY GKHEEF SMLILIP--FEGMP----LKTLLSNLVT SPLD---WITDFKRDDKR-----PEIDVFI PR
CpSPN8  : -----IELPYGVENHMSMILILP--NPGMT----LKDMFLIF--LKAN---LKT V FQELKVS-----QEERGDVEIDCFIPR
CpSPN9  : -----LELPYGDGDRFSMLIFLP--YQSSS----VAKVTDQL--KRV T---LKSIFYIFQRN-----GRDTVQVQIP S
CpSPN10 : -----IELPY-DGGRY SLLIVLP--RTRDG----LTRLTADL--PAAP---LEDIQDSLREE-----ELQVSLPT
CpSPN11 : -----VELPY-EGGRYS MVLLVP--QDHDG----LAGLIRDL--PYMS---LPQICKMMEPS-----HVQLSLPR
CpSPN12 : -----IVLPF-ENNEYS LVMLIP--VPGAD----VSAVLTSL--DGE---TLANYQNLRRQ-----DVLLEIPK
CpSPN13 : -----IALPY-KDNTTTMYVLKP--LKKLS----LQDLMSRL--NYSR---IDQLISNMTND-----RAVIRFPK
CpSPN14 : -----LELPC-IDKRRSMLIFLPTNGTIKD---LFFHMKRI--RIAT---IFNLFKKS KSK-----LVVLRLPR
CpSPN15 : -----LQMN Y-KGRQASMI LIVP--DAVEG----LGAMLQQL--SDHD---LMDEVAVMRAT-----RIEVMIPK
CpSPN16 : -----VELPYGNDGKYAMLLIP--HPRVK----LDDVYRRL--ANVT---LTEITKKLQSD-----IDEYGMTDVDIKLPR
CpSPN17 : -----LQMFY-VGGEAS MVIVLP--DEIEG----LSAVMKQL-ATGYD---LMAEIKSLQKK-----QLQV IIPK
CpSPN18 : -----LQMPY-VGGEAS MVIIIP--DEIEGDTGSVTDLVKRL-AAGFD---LMSEIKRLKKT-----DLQVKIPK
CpSPN19 : -----LQMFY-KGGQAS MVIVLP--DKIEGETAGVGGLMERL-IAGYD---LMADIKSLQKT-----PLKV IIPK
CpSPN20 : -----IEIPY-ATPGLTLLI LIVP--KELS----LRPLVERA--AAVG---LDAVVGVMHTM-----RIAVTLPL
CpSPN21 : -----LQMFY-VGGEAS MVIVLP--DEIEG----LSAVMKQL-AAGYD---LMTEIRSLQKK-----ELEV IIPK
CpSPN22 : -----VRIL Y-TGKESSAI IILP--NSING----TMQLAKDL-QNTAN---WKKVIDSLYPQ-----KVKLYLPK
CpSPN23 : -----LQMFY-VGGEAS MVIVLP--DEIEG----LSAVMKQL-ATGYD---LMAEIKSLQKK-----QLQV IIPK
CpSPN24 : RIHF PFQFLQMDY-KGRQAS MVIVLP--DEIEG----LGAVLQQL-AAGHD---LMAELTDMKST-----LLDVMVPK
CpSPN25 : -----VRIP Y-TGEESSAI IVLP--NSING----TMHLAQNL-QFPAN---WKKLLDSLSPQ-----KVQLYLPK
CpSPN26 : -----AALGN-TNSIISTLFLMPGQQGNVVHAEDLELLEKRL LGSNPSTPAWNRLRLRTL LPR-----IGLELQIPR

```



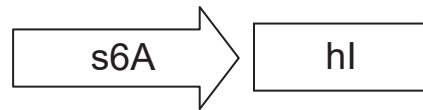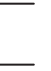

MsSPN1K : FKIETTT-DLKEVLSN-----MNIKKLFTPGAA-----RLENLLKTKESLYVDAA  
CpSPN1 : FKIETTI-DLKKVLQK-----IGITSLFDAKA-----RLDNLLKNESGLYVSDA  
CpSPN2 : FKIETEI-DLKELLPK-----LGIKAI FDEKNS-----GLTKILDSTEPLYVSKA  
CpSPN3 : FKFDFTS-ILDGVLKD-----LGIRQAFEDTASFP-----GLARGQSPQNRLKISKV  
CpSPN4 : FKIDSSI-ELNEILKEG-----MGIYDLFDPVKA-----NLGRL--ARVPMYVTRV  
CpSPN5 : FKISTNI-VMNRPLND-----MGVYDIFDPEYA-----SFSRA--TNESIYVSAI  
CpSPN6 : FTVEKSL-PLRPILQS-----LGVGDLFNSTSD-----FTTL--TEDQVSFDDA  
CpSPN7 : FKISSQI-DLIPALKY-----TGIHTIFDSEKA-----QLPGI--SDSPLFVSKT  
CpSPN8 : FKIVSNI-ELNEILKNG-----MGIHDLFDPKNV-----FLPRM--SRWPIRGTRV  
CpSPN9 : AQFPHI-----SDYSFYISNV  
CpSPN10 : FYVETTT-KPVAALAK-----FGVSSI FSRDAE-----LSGVS-SAEGLFVQEL  
CpSPN11 : FTVDYSE-DMVGPLRS-----MRITTLFSSKSN-----LSGII--EGGPAQINHL  
CpSPN12 : FTVRSNA-NLQPIFAK-----MGITKMFSPTSE-----LSHIGLYRANSPQVSSA  
CpSPN13 : MDLKNSI-QLED SLKS-----IGLSEMFSP TANFALMIDTDRDKSNEELLTRIIFEDKSQHIQDAVNGL--PNPGVHVDKV  
CpSPN14 : FKISSEIVNLPELISD-----MGVSYIFKINGN-----LKGI--SDFPIRVNRM  
CpSPN15 : FKIETDI-NLEELLPK-----MGIHDIFDQNKs-----DIRMFT-SHDRMCVTQA  
CpSPN16 : FKISTNV-VMNKPLND-----MGVYDIFQPDVA-----SFKRV--TNENIYVSAI  
CpSPN17 : FKIESEI-NLKELLPKGTSPTRKVGVNIFCCNPTVWGIVGKMGIKAI FDPIKS-----EVNMLS-SDDRQFVSQA  
CpSPN18 : FKVETEI-NLRELLPK-----MGIQTIFDKNKA-----EINMLS-SNDPLHVSEA  
CpSPN19 : FKAETEI-NLKELLPK-----MGIKAVFDMNKG-----DTTMLS-SDEPLYVSEA  
CpSPN20 : YTLRMTL-LLPNKLQD-----MGMQSLLTNGTD-----CQPVRLSHA  
CpSPN21 : FKIESEI-NLKELLPK-----MGIKTIFDPIKS-----EVNMLS-SDDRQFVSQA  
CpSPN22 : FVISTTT-DLKVLLQK-----SEV-----  
CpSPN23 : FKIESEI-NLKELLPK-----MGIKAI FDPIKS-----EVNMLS-SDDRQFVSQA  
CpSPN24 : FKIETEI-DLTQLLPE-----MGIKLIFND RYS-----NINMLT-SNEPLYVSKA  
CpSPN25 : FVISTTT-DLKDLLKK-----ANITNWFNCGNS-----GLSGLLAKPEDICITEA  
CpSPN26 : FSHKSIF-NVSSTLKK-----MGLKDLFDAEHA-----DLGGLNGPSKDLYLSDM

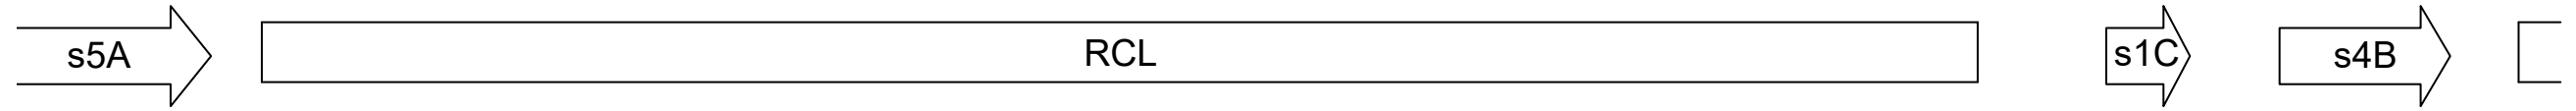

```
MsSPN1K : IQKAFIEVNEEGAEAAA-----ANAF-----KITTYSFHFVPKVEINKPFFFSCLKYNRNS-
CpSPN1  : IQKAFIEVNEEGAEAAA-----ANDF-----GVTY-----LSAYVKPETYFNADHPFIFILKSGESA-
CpSPN2  : IQKAFIEVNEEGAEAAA-----ATAM-----NIMM-----CCAMVDVAPVPVFTADRPFLLAVIQAHGIL-
CpSPN3  : LQSGGIEVNELGSAVYS-----VTEV-----SLVN-----KFGEDSEYSAGEVIANRPFLFFIEDEATRQ
CpSPN4  : IHKAEIEVTTEGTTASG-----ATAA-----EFANRIGVIRFEANRPFSYLIVEKVTNT
CpSPN5  : VHKADIEVSETGTVASA-----VSTA-----YLSNRFGTTKLIADRPFLLYFIEKSTAT
CpSPN6  : VHKAKIQIDEEGTVAAG-----ATAI-----FGFRSSRPAEPTRFVANFPFVYLVYERPTNS
CpSPN7  : IQNVEIDVKEEGTVAAA-----ATVV-----GLENRFLSQRFKANKEFVFMITHRKSNV
CpSPN8  : IHKTEIDVTEESSTPSG-----NIAP-----EFANDSKVLIFEANRPFSYFIVEKHTDT
CpSPN9  : VQKADVEVTEEGTVAAA-----ASAA-----EFEARRLPDSFQANRPFVFMIVDKLNYI
CpSPN10 : VQHVAVRVDNADTSASQ-----LSAI-----NAVQESLKNIPSSIKEPRRFSVDRPFMFIFIIDRLDNL
CpSPN11 : YHRVYVSVDEEDGTVAAG-----ASAA-----LVVPLIEGNVQLVVDKPFPAFFIKDNTLGL
CpSPN12 : VHSAMMSIDERGATAAG-----STVV-----AVVALSFDNPSVVFRADRPFLLAVLWDNQLNV
CpSPN13 : LHEVRITIDEYGTAVAA-----ASGG-----FLSRTAEQFYVDSPFYMFIRDESTKL
CpSPN14 : KQVVEIEVTEEGVAADI-----VQNL-----IDPEVEPMKFEANRPFAFMLVDKPTET
CpSPN15 : IQRAVIEXNETGTGTEAAA-----CTLT-----AISE-----ICAVIELEPPKRFVADRPFLLYLLARGVP-
CpSPN16 : VHKADIEVTEGTGTVASA-----STSA-----NFADRISTPLMRANKPFAYFIEKTTTT
CpSPN17 : IQKAFIAVDELGTGTEAAA-----ASLLTTWPYQQRKRDSTTLSCIGLILYVDSVDVDIRHF---IEHGHSC
CpSPN18 : IQKAFITVDEKGTGTEAAA-----ANEI-----TLQLLCLRWWMGETFIADHPFLYILLAQEIP-
CpSPN19 : IQKAFISVDEAGTEAAA-----ATQM-----VRRR-----LCGHWWTGETFVANRPFLYQLTAREIP-
CpSPN20 : VQRLMF-WAEAGRNAFK-----DDGI-----EWDPRPELEIVVDRPYLFFVVRWNNVT-
CpSPN21 : IQKAFIAVDELGTGTEAAA-----ATSM-----WQRERCGHFWTGDFTADRPFLLFLLQAHEIP-
CpSPN22 : -----KLMFYVIMCVVT---
CpSPN23 : IQKAFIAVDELGTGTEAAA-----ASLLTTWPYQQRKRDSTTLSCIGLILYVDSVDVDIRHF---IEHGHSC--
CpSPN24 : VQKALIEVDEAGTKAVA-----RTMI-----PPEMPCCIRRPRKFKADRPFVYLLAAREFP-
CpSPN25 : IQKAWCEFNEIGTEATA-----ANVV-----VGVGAMPMPVVFKANRSEFLFYILLKNASE
CpSPN26 : VQATTFVTCGEGIIIGEQHHIEEYPESIELARRRRTSRWATGWDEPRDYQRAFHDPHDVGDMNLPLHLRPRQARLPARNAQPARLKFDRLPFLLYFVRHNPSGM
```



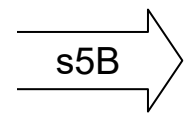

```
MsSPN1K : -MFSGVCVQP-----
CpSPN1  : -LFSGVFYN-----
CpSPN2  : -YFLAVHSGNE-----
CpSPN3  : LLFTGRVSDPLVATAEFKAHTPSA-----
CpSPN4  : IVFGGVYQQPILY-----
CpSPN5  : VIFAGIYSKPSLY-----
CpSPN6  : VLFMGVYRDPKK-----
CpSPN7  : ILFAGVYSDDPAVV-----
CpSPN8  : VVLAVYRKPILY-----
CpSPN9  : PLFTEEDGTERSRLRDSLTFGR-----
CpSPN10 : VVIAGKVIDPEAPTPFEI-----
CpSPN11 : VLFEGKIEEPHEYVAPKKGSENNFVKSSRNSFGTRF----
CpSPN12 : PLFMTKIEDPSL-----
CpSPN13 : VTFSAAIIFNPNL-----
CpSPN14 : ILFAGVYSIPSVF-----
CpSPN15 : -TFIGVYHQ-----
CpSPN16 : VIFGGIYSKPTVY-----
CpSPN17 : ----GLPEHPHFHHMNSVQL-----
CpSPN18 : -IFYGIFHGNETSL-----
CpSPN19 : -IFYGTFYGNYSQ-----
CpSPN20 : -IMNGVFVL-----
CpSPN21 : -VFYGTfngSDIIFFKY-----
CpSPN22 : ----LATDS-----
CpSPN23 : ---CGLPEHPHFHHMNSVQL-----
CpSPN24 : -IFLGIYQGSEFAVPDVSDSDIDQTKPVNVGVKKQLSK--
CpSPN25 : LPIFCGKYGNPN-----
CpSPN26 : ILYVGRYNPRLLP-----
```

Shutter    Breach    Hinge    Gate

**Figure S1** Multiple sequence alignment of 26 *Cydia pomonella* (CpSPN1-26) with *Manduca sexta* serpin-1K (MsSPN1K). Conserved residues in regions, which are critical for the inhibition mechanism, are highlighted based on the amino acid residues of MsSPN1K. Residues corresponding to the shutter are in cyan, residues of the breach in yellow, residues conserved in the hinge region are in green, and residues of the gate region are in magenta. Predicted  $\alpha$ -helix and  $\beta$ -strand and reactive center loop (RCL) secondary structures of serpins are assigned based on the crystal structure of MsSPN1K.
