# Supplementary material for: A Genome-Wide Analysis of Serine Protease Inhibitors in Cydia pomonella Provides Insights into Their Evolution and Expression Pattern
Source: MDPI journal article supplement (doi:10.3390/ijms242216349), 2023-11-15
Supplement: s1 [file s1]

**Table S1. Complete sequences of *Cydia pomonella* serpins**

| Gene name | chr number | CDS sequence                                                                                                                                                                                                                                                                                                                                                                                                                                                                                                                                                                                                                                                                                                                                                                                                                                                                                                                                                                                                                                                                                                                                                                                                                                                          | Protein sequence*                                                                                                                                                                                                                                                                                                                                                                                                                                   |
|-----------|------------|-----------------------------------------------------------------------------------------------------------------------------------------------------------------------------------------------------------------------------------------------------------------------------------------------------------------------------------------------------------------------------------------------------------------------------------------------------------------------------------------------------------------------------------------------------------------------------------------------------------------------------------------------------------------------------------------------------------------------------------------------------------------------------------------------------------------------------------------------------------------------------------------------------------------------------------------------------------------------------------------------------------------------------------------------------------------------------------------------------------------------------------------------------------------------------------------------------------------------------------------------------------------------|-----------------------------------------------------------------------------------------------------------------------------------------------------------------------------------------------------------------------------------------------------------------------------------------------------------------------------------------------------------------------------------------------------------------------------------------------------|
| CpSPN1A   | chr5       | ATGAATACACTTATATTCTTTACAGCCGTCGTGGCCATGGCTTCAGCCACTGGTGAGGAGAAGATCCTCAATGATGGAACAACGTGTTTACTGCCAACATGTTTTCGGAGGTGGTAAAA<br>GAGCAGGCCGGCAAGAGCGTGGTGATGTCCGCCTTCTCTGTCTGCAGCCGCTGGCTCAACTGGCCCTGGCCTCTGTGCGCGAGTCCCATGACGAGCTCCTCAGAGCCATCGGCCTTCC<br>CAACGACAATGTGACCAAAGCAGTGTTCCCCAAAGTGACCGCTCAACTTCGAGCAGTACAAGGAGTGAAACTGAACATGGCCAACAAAATATACATTCCCACAAACGCTCAAGTTAAGG<br>AAGACTTTGCCGCACTCTCAAAGAGCGTCTTCGGTTCAGAATTCAAGAACATTGACTTTACGAAAAATGTGCCTGCTGCTCAGGAAATCAACTCATGGGTGGAGGATCACACAAACCAC<br>AAAATCAAGGACTTGGTGCGACCCGAACCTCCCTGGGAGCTGATACTCGTGCGGTCTCGTCAATGCTCTGTACTTCAAGGGTTCGTGGGAAAAAAAAATTCAATGATAAGGCTACTACTGAT<br>AGTGATTTCCATGTAACATAAGACAAGACAGTGAAAGTGCCGACGATGTACAAGAAAGACGACTTTAAATACGCCGAGAGCAAAGAGCTCGATGCTAAGCTCTTGGAAGTCCCATATGA<br>AGGAAAGGAGGCATCTTTCCTTATCGTCTCCCCAACGAAATCGACGGTCTGCCAGCTTTGAGGAGAACTGAAGAACCCCACTGCCTTAGACAAAGCTGTTGCCGAGATGCGCGAG<br>GTGGAAGTCAACGTCTACCTCCCTAAGTTCAAGATTGAAACTACTATCGACCTGAAGAAAGTTCTGCAAAAGATCGGCATTACCAGCCTTTTCGACGCCGCCAAGGCCAGATTGGACAAT<br>CTCTTGAAGAACGAAAGCGGTCTGTACGTCAGTGATGCCATCCAGAAGGCTTTCATTGAAGTCAACGAGGAGGGTGCCGAGGCAGCTGCAGCTAATGATTTCGGTGTAACGTACCTGA<br>GCGCATACGTTAAGCCCGAAACCTACTTCAACGCTGACCATCCATTTCATCTTATTCTTAAGTCGGGAGAAAGCGCGTTGTTCAAGTGGCGTTCCTTATAATTAG            | <u>MNTLIFFTAVVAMASATG</u> EEEKILNDGNNVFTANMFSEVVK<br>EQAGKSVVMSAFSVLQPLAQLALASVGESHDELLRAIGLPN<br>DNVTKAVFPKVTAQLRAVQGVKLNLMANKIYIPTNAQVKED<br>FAALSKSVFGSEFKNIDFTKNVPAAQEINSWVEDHTNHKIK<br>DLVDPNSLGADTRAVLVNALYFKGSWEKKFNDKATTDSD<br>HVTKDKTVKVPTMYKKDDFKYAESKELDAKLELPEYEGKEA<br>SFLIVLPNEIDGLPALQEKLKNPTALDKAVAEMREVEVN<br>PKFKIETTIDLKKVLQKIGITSLFDAAKARLDNLLKNESGLYVS<br>DAIQKAFIEVNEEGAEAAAAANDFGVTYLSAYVKPETYFNAD<br>HPFIFILKSGESALFSGVFYN  |
| CpSPN1B   | chr5       | ATGAATACACTTATATTCTTTACAGCCGTCGTGGCCATGGCTTCAGCCACTGGTGAGGAGAAGATCCTCAATGATGGAACAACGTGTTTACTGCCAACATGTTTTCGGAGGTGGTAAAA<br>GAGCAGGCCGGCAAGAGCGTGGTGATGTCCGCCTTCTCTGTCTGCAGCCGCTGGCTCAACTGGCCCTGGCCTCTGTGCGCGAGTCCCATGACGAGCTCCTCAGAGCCATCGGCCTTCC<br>CAACGACAATGTGACCAAAGCAGTGTTCCCCAAAGTGACCGCTCAACTTCGAGCAGTACAAGGAGTGAAACTGAACATGGCCAACAAAATATACATTCCCACAAACGCTCAAGTTAAGG<br>AAGACTTTGCCGCACTCTCAAAGAGCGTCTTCGGTTCAGAATTCAAGAACATTGACTTTACGAAAAATGTGCCTGCTGCTCAGGAAATCAACTCATGGGTGGAGGATCACACAAACCAC<br>AAAATCAAGGACTTGGTGCGACCCGAACCTCCCTGGGAGCTGATACTCGTGCGGTCTCGTCAATGCTCTGTACTTCAAGGGTTCGTGGGAAAAAAAAATTCAATGATAAGGCTACTACTGAT<br>AGTGATTTCCATGTAACATAAGACAAGACAGTGAAAGTGCCGACGATGTACAAGAAAGACGACTTTAAATACGCCGAGAGCAAAGAGCTCGATGCTAAGCTCTTGGAAGTCCCATATGA<br>AGGAAAGGAGGCATCTTTCCTTATCGTCTCCCCAACGAAATCGACGGTCTGCCAGCTTTGAGGAGAACTGAAGAACCCCACTGCCTTAGACAAAGCTGTTGCCGAGATGCGCGAG<br>GTGGAAGTCAACGTCTACCTCCCTAAGTTCAAGATTGAAACTACTATCGACCTGAAGAAAGTTCTGCAAAAGATCGGCATTACCAGCCTTTTCGACGCCGCCAAGGCCAGATTGGACAAT<br>CTCTTGAAGAACGAAAGCGGTCTGTACGTCAGTGATGCCATCCAGAAGGCTTTCATTGAAGTCAACGAGGAGGGTGCCGAGGCAGCTGCAGCTAATGCATTCCAAGTTGTAAGCCGAT<br>CAGGCAAATTCTACTACGTTGAACCAAAAGAATTTAACGCAGACCATCCTTTCCTCTTCTTAAATAGTCACTCAAACGAGCTTTTCAACGGAGCTTATATTCTATTA          | <u>MNTLIFFTAVVAMASATG</u> EEEKILNDGNNVFTANMFSEVVK<br>EQAGKSVVMSAFSVLQPLAQLALASVGESHDELLRAIGLPN<br>DNVTKAVFPKVTAQLRAVQGVKLNLMANKIYIPTNAQVKED<br>FAALSKSVFGSEFKNIDFTKNVPAAQEINSWVEDHTNHKIK<br>DLVDPNSLGADTRAVLVNALYFKGSWEKKFNDKATTDSD<br>HVTKDKTVKVPTMYKKDDFKYAESKELDAKLELPEYEGKEA<br>SFLIVLPNEIDGLPALQEKLKNPTALDKAVAEMREVEVN<br>PKFKIETTIDLKKVLQKIGITSLFDAAKARLDNLLKNESGLYVS<br>DAIQKAFIEVNEEGAEAAAAANAFQVVSRSKFYYVEPKEFN<br>ADHPFLFFLNSHSNELFNGAYIH |
| CpSPN1C   | chr5       | ATGAATACACTTATATTCTTTACAGCCGTCGTGGCCATGGCTTCAGCCACTGGTGAGGAGAAGATCCTCAATGATGGAACAACGTGTTTACTGCCAACATGTTTTCGGAGGTGGTAAAA<br>GAGCAGGCCGGCAAGAGCGTGGTGATGTCCGCCTTCTCTGTCTGCAGCCGCTGGCTCAACTGGCCCTGGCCTCTGTGCGCGAGTCCCATGACGAGCTCCTCAGAGCCATCGGCCTTCC<br>CAACGACAATGTGACCAAAGCAGTGTTCCCCAAAGTGACCGCTCAACTTCGAGCAGTACAAGGAGTGAAACTGAACATGGCCAACAAAATATACATTCCCACAAACGCTCAAGTTAAGG<br>AAGACTTTGCCGCACTCTCAAAGAGCGTCTTCGGTTCAGAATTCAAGAACATTGACTTTACGAAAAATGTGCCTGCTGCTCAGGAAATCAACTCATGGGTGGAGGATCACACAAACCAC<br>AAAATCAAGGACTTGGTGCGACCCGAACCTCCCTGGGAGCTGATACTCGTGCGGTCTCGTCAATGCTCTGTACTTCAAGGGTTCGTGGGAAAAAAAAATTCAATGATAAGGCTACTACTGAT<br>AGTGATTTCCATGTAACATAAGACAAGACAGTGAAAGTGCCGACGATGTACAAGAAAGACGACTTTAAATACGCCGAGAGCAAAGAGCTCGATGCTAAGCTCTTGGAAGTCCCATATGA<br>AGGAAAGGAGGCATCTTTCCTTATCGTCTCCCCAACGAAATCGACGGTCTGCCAGCTTTGAGGAGAACTGAAGAACCCCACTGCCTTAGACAAAGCTGTTGCCGAGATGCGCGAG<br>GTGGAAGTCAACGTCTACCTCCCTAAGTTCAAGATTGAAACTACTATCGACCTGAAGAAAGTTCTGCAAAAGATCGGCATTACCAGCCTTTTCGACGCCGCCAAGGCCAGATTGGACAAT<br>CTCTTGAAGAACGAAAGCGGTCTGTACGTCAGTGATGCCATCCAGAAGGCTTTCATTGAAGTCAACGAGGAGGGTGCCGAGGCAGCTGCAGCTAATGTGTTCAACATTGATAGAACGAT<br>GATAATTCCGGAAACATACTTGTTTATGGCAGACCGCCCGTTCTTGTTTACCTTAACGTGCGCTCCAGCATTTTATTCAACGGCTCCTTCCAGTCTTAA                 | <u>MNTLIFFTAVVAMASATG</u> EEEKILNDGNNVFTANMFSEVVK<br>EQAGKSVVMSAFSVLQPLAQLALASVGESHDELLRAIGLPN<br>DNVTKAVFPKVTAQLRAVQGVKLNLMANKIYIPTNAQVKED<br>FAALSKSVFGSEFKNIDFTKNVPAAQEINSWVEDHTNHKIK<br>DLVDPNSLGADTRAVLVNALYFKGSWEKKFNDKATTDSD<br>HVTKDKTVKVPTMYKKDDFKYAESKELDAKLELPEYEGKEA<br>SFLIVLPNEIDGLPALQEKLKNPTALDKAVAEMREVEVN<br>PKFKIETTIDLKKVLQKIGITSLFDAAKARLDNLLKNESGLYVS<br>DAIQKAFIEVNEEGAEAAAAANVFTIDRTMIIPETYLFMADR<br>PFLFYLVNGSSILFNGSFQS   |
| CpSPN1D   | chr5       | ATGAATACACTTATATTCTTTACAGCCGTCGTGGCCATGGCTTCAGCCACTGGTGAGGAGAAGATCCTCAATGATGGAACAACGTGTTTACTGCCAACATGTTTTCGGAGGTGGTAAAA<br>GAGCAGGCCGGCAAGAGCGTGGTGATGTCCGCCTTCTCTGTCTGCAGCCGCTGGCTCAACTGGCCCTGGCCTCTGTGCGCGAGTCCCATGACGAGCTCCTCAGAGCCATCGGCCTTCC<br>CAACGACAATGTGACCAAAGCAGTGTTCCCCAAAGTGACCGCTCAACTTCGAGCAGTACAAGGAGTGAAACTGAACATGGCCAACAAAATATACATTCCCACAAACGCTCAAGTTAAGG<br>AAGACTTTGCCGCACTCTCAAAGAGCGTCTTCGGTTCAGAATTCAAGAACATTGACTTTACGAAAAATGTGCCTGCTGCTCAGGAAATCAACTCATGGGTGGAGGATCACACAAACCAC<br>AAAATCAAGGACTTGGTGCGACCCGAACCTCCCTGGGAGCTGATACTCGTGCGGTCTCGTCAATGCTCTGTACTTCAAGGGTTCGTGGGAAAAAAAAATTCAATGATAAGGCTACTACTGAT<br>AGTGATTTCCATGTAACATAAGACAAGACAGTGAAAGTGCCGACGATGTACAAGAAAGACGACTTTAAATACGCCGAGAGCAAAGAGCTCGATGCTAAGCTCTTGGAAGTCCCATATGA<br>AGGAAAGGAGGCATCTTTCCTTATCGTCTCCCCAACGAAATCGACGGTCTGCCAGCTTTGAGGAGAACTGAAGAACCCCACTGCCTTAGACAAAGCTGTTGCCGAGATGCGCGAG<br>GTGGAAGTCAACGTCTACCTCCCTAAGTTCAAGATTGAAACTACTATCGACCTGAAGAAAGTTCTGCAAAAGATCGGCATTACCAGCCTTTTCGACGCCGCCAAGGCCAGATTGGACAAT<br>CTCTTGAAGAACGAAAGCGGTCTGTACGTCAGTGATGCCATCCAGAAGGCTTTCATTGAAGTCAACGAGGAGGGTGCCGAGGCAGCTGCAGCTAATGTGTTCAACATTGATAGAACGAT<br>AGGAAAGGAGGCATCTTTCCTTATCGTCTCCCCAACGAAATCGACGGTCTGCCAGCTTTGAGGAGAACTGAAGAACCCCACTGCCTTAGACAAAGCTGTTGCCGAGATGCGCGAG | <u>MNTLIFFTAVVAMASATG</u> EEEKILNDGNNVFTANMFSEVVK<br>EQAGKSVVMSAFSVLQPLAQLALASVGESHDELLRAIGLPN<br>DNVTKAVFPKVTAQLRAVQGVKLNLMANKIYIPTNAQVKED<br>FAALSKSVFGSEFKNIDFTKNVPAAQEINSWVEDHTNHKIK<br>DLVDPNSLGADTRAVLVNALYFKGSWEKKFNDKATTDSD<br>HVTKDKTVKVPTMYKKDDFKYAESKELDAKLELPEYEGKEA<br>SFLIVLPNEIDGLPALQEKLKNPTALDKAVAEMREVEVN<br>SFLIVLPNEIDGLPALQEKLKNPTALDKAVAEMREVEVN                                                                              |

|         |      |                                                                                                                                                                                                                                                                                                                                                                                                                                                                                                                                                                                                                                                                                                                                                                                                                                                                                                                                                                                                                                                                                                                                                                                                                                                                  |                                                                                                                                                                                                                                                                                                                                                                                                                                                            |
|---------|------|------------------------------------------------------------------------------------------------------------------------------------------------------------------------------------------------------------------------------------------------------------------------------------------------------------------------------------------------------------------------------------------------------------------------------------------------------------------------------------------------------------------------------------------------------------------------------------------------------------------------------------------------------------------------------------------------------------------------------------------------------------------------------------------------------------------------------------------------------------------------------------------------------------------------------------------------------------------------------------------------------------------------------------------------------------------------------------------------------------------------------------------------------------------------------------------------------------------------------------------------------------------|------------------------------------------------------------------------------------------------------------------------------------------------------------------------------------------------------------------------------------------------------------------------------------------------------------------------------------------------------------------------------------------------------------------------------------------------------------|
|         |      | GTGGAAGTCAACGTCTACCTCCCTAAGTTCAAGATTGAACTACTATCGACCTGAAGAAAGTTCTGCAAAAGATCGGCATTACCAGCCTTTTCGACGCCGCCAAGGCCAGATTGGACAATCTCTTGAAGAACGAAAGCGGTCTGTACGTCAGTGATGCCATCCAGAAGGCTTTCATTGAAGTCAACGAGGAGGGTGCCGAGGCAGCTGCAGCTAATGACCTCGGGATATATGTAATGATGCTAAACCAGAAATATGGTTTAAGGCAGACCGGCCGTTTCTATTCTTCTTAACGCCGGCTCCACTACTTTGTTCAACGGCTCCTACCAATCCTAA                                                                                                                                                                                                                                                                                                                                                                                                                                                                                                                                                                                                                                                                                                                                                                                                                                                                                                                    | PKFKIETTIDLKKVLQKIGITSLFDAAKARLDNLLKNESGLYVS<br>DAIQKAFIEVNEEGAEAAAANDLGIYVMMLKPEIWFKADR<br>PFLFFLNAGSTTLFNGSYQS                                                                                                                                                                                                                                                                                                                                           |
| CpSPN1E | chr5 | ATGAATACACTTATATTCTTTACAGCCGTCGTGGCCATGGCTTCAGCCACTGGTGAGGAGAAGATCCTCAATGATGGAAACAACGTGTTTACTGCCAACATGTTTTCGGAGGTGGTAAAA<br>GAGCAGGCCCGCAAGAGCGTGGTGATGTCCGCCTTCTCTGTCTGCAGCCGCTGGCTCAACTGGCCCTGGCCTCTGTGCGCGAGTCCCATGACGAGCTCCTCAGAGCCATCGGCCTTCC<br>CAACGACAATGTGACCAAAGCAGTGTTCCCCAAAGTGACCGCTCAACTTCGAGCAGTACAAGGAGTGAACTGAACATGGCCAACAAAATATACATTCCCACAAACGCTCAAGTTAAGG<br>AAGACTTTGCCGCACTCTCAAAGAGCGTCTTCGGTTCAGAATTCAAGAACATTGACTTTACGAAAAATGTGCCTGCTGCTCAGGAAATCAACTCATGGGTGGAGGATCACACAAACCAC<br>AAAATCAAGGACTTGGTCGACCCGAACTCCCTGGGAGCTGATACTCGTGCGGTCTCGTCAATGCTCTGTACTTCAAGGGTTCTGTGGGAAAAAAAAATTCAATGATAAGGCTACTACTGAT<br>AGTGATTTCCATGTAACATAAGACAAGACAGTGAAAGTGCCGACGATGTACAAGAAAGACGACTTTAAATACGCCGAGAGCAAAGAGCTCGATGCTAAGCTCTTGGAAGTGCCATATGA<br>AGGAAAGGAGGCATCTTTCCTTATCGTCTCCCCAACGAAATCGACGGTCTGCCAGCTTTCAGGAGAACTGAAGAACCCCACTGCCTTAGACAAAGCTGTTGCCGAGATGCGCGAG<br>GTGGAAGTCAACGTCTACCTCCCTAAGTTCAAGATTGAACTACTATCGACCTGAAGAAAGTTCTGCAAAAGATCGGCATTACCAGCCTTTTCGACGCCGCCAAGGCCAGATTGGACAAT<br>CTCTTGAAGAACGAAAGCGGTCTGTACGTCAGTGATGCCATCCAGAAGGCTTTCATTGAAGTCAACGAGGAGGGTGCCGAGGCAGCTGCAGCTAATGCATTTCTACTCGTGGAGGAGT<br>CGTTGGCCCTAGTCGAAGAGCTGTACTTTGACGCCGACCATCCATTTATTTTTCATCTTAGGCAAGGAGCCGTACACTTTTTAACGGAGTTGTCAATTTCTGA           | <u>MNTLIFFTAVVAMASATG</u> EEEKILNDGNNVFTANMFSEVVK<br>EQAGKSVVMSAFSVLQPLAQLALASVGESHDELLRAIGLPN<br>DNVTKAVFPKVTAQLRAVQGVKLNMANIKIYIPTNAQVKED<br>FAALSKSVFGSEFKNIDFTKNVPAAQEINSWVEDHTNHKIK<br>DLVDPNSLGADTRAVLVNLYFKGSWEKKFNDKATTDSDF<br>HVTKDKTVKVPTMYKKDDFKYAESKELDAKLELPPYEGKEA<br>SFLIVLPNEIDGLPALQEKLKNPTALDKAVAEMREVEVNVYL<br>PKFKIETTIDLKKVLQKIGITSLFDAAKARLDNLLKNESGLYVS<br>DAIQKAFIEVNEEGAEAAAANAFLLVEESLALVEELYFDADH<br>PFIFHLRQGARTLFNGVVNF       |
| CpSPN1F | chr5 | ATGAATACACTTATATTCTTTACAGCCGTCGTGGCCATGGCTTCAGCCACTGGTGAGGAGAAGATCCTCAATGATGGAAACAACGTGTTTACTGCCAACATGTTTTCGGAGGTGGTAAAA<br>GAGCAGGCCCGCAAGAGCGTGGTGATGTCCGCCTTCTCTGTCTGCAGCCGCTGGCTCAACTGGCCCTGGCCTCTGTGCGCGAGTCCCATGACGAGCTCCTCAGAGCCATCGGCCTTCC<br>CAACGACAATGTGACCAAAGCAGTGTTCCCCAAAGTGACCGCTCAACTTCGAGCAGTACAAGGAGTGAACTGAACATGGCCAACAAAATATACATTCCCACAAACGCTCAAGTTAAGG<br>AAGACTTTGCCGCACTCTCAAAGAGCGTCTTCGGTTCAGAATTCAAGAACATTGACTTTACGAAAAATGTGCCTGCTGCTCAGGAAATCAACTCATGGGTGGAGGATCACACAAACCAC<br>AAAATCAAGGACTTGGTCGACCCGAACTCCCTGGGAGCTGATACTCGTGCGGTCTCGTCAATGCTCTGTACTTCAAGGGTTCTGTGGGAAAAAAAAATTCAATGATAAGGCTACTACTGAT<br>AGTGATTTCCATGTAACATAAGACAAGACAGTGAAAGTGCCGACGATGTACAAGAAAGACGACTTTAAATACGCCGAGAGCAAAGAGCTCGATGCTAAGCTCTTGGAAGTGCCATATGA<br>AGGAAAGGAGGCATCTTTCCTTATCGTCTCCCCAACGAAATCGACGGTCTGCCAGCTTTCAGGAGAACTGAAGAACCCCACTGCCTTAGACAAAGCTGTTGCCGAGATGCGCGAG<br>GTGGAAGTCAACGTCTACCTCCCTAAGTTCAAGATTGAACTACTATCGACCTGAAGAAAGTTCTGCAAAAGATCGGCATTACCAGCCTTTTCGACGCCGCCAAGGCCAGATTGGACAAT<br>CTCTTGAAGAACGAAAGCGGTCTGTACGTCAGTGATGCCATCCAGAAGGCTTTCATTGAAGTCAACGAGGAGGGTGCCGAGGCAGCTGCAGCTAATGTGTTCCCGTTCCTCATGGCAG<br>CAAGTTGGCCTCCACCTAGAGTGCGGGAGTTTATTGCAGACCATGCCTTCATTTTCTCCTGAAGGCGGGAGATAGCGCACTCTTTGGCGGAGTATTCGCTAACTAG        | <u>MNTLIFFTAVVAMASATG</u> EEEKILNDGNNVFTANMFSEVVK<br>EQAGKSVVMSAFSVLQPLAQLALASVGESHDELLRAIGLPN<br>DNVTKAVFPKVTAQLRAVQGVKLNMANIKIYIPTNAQVKED<br>FAALSKSVFGSEFKNIDFTKNVPAAQEINSWVEDHTNHKIK<br>DLVDPNSLGADTRAVLVNLYFKGSWEKKFNDKATTDSDF<br>HVTKDKTVKVPTMYKKDDFKYAESKELDAKLELPPYEGKEA<br>SFLIVLPNEIDGLPALQEKLKNPTALDKAVAEMREVEVNVYL<br>PKFKIETTIDLKKVLQKIGITSLFDAAKARLDNLLKNESGLYVS<br>DAIQKAFIEVNEEGAEAAAANVFPVPMMAASWPPPRVREFI<br>ADHAFILLKAGDSALFGGVFAN      |
| CpSPN2  | chr1 | ATGTCAACGTTTTTACTAACCTTTCTGTTTTTATATTTTCAACAAACCAAATCAGTTCACAAATATGGATTCCGCTGCTGTATCCTCGGCTGTCGCCAAGTTCTCCATGCAGTTCTGCAATG<br>AGCTGGATAAAAGCCAGAATGTGGTGTCTTCCCCCTATCGGCTGAAATTCTGCTGGCACTCCTTTCATTGGATCCTCTGAACCTGCCCTTCCAGAGCTTCTAGGAGCCATTGGATTTC<br>AGACACTGATGCAATCCGCTCATATTTTCACTTGTGTATCAAGACTGAAATCCGTGAAAGGAGTCACTTTGGATGTGGCCAACCGGGTTTACTTACAACAGGGCCATGAGCTGGATCC<br>CAAGCTTAAAGATGATGCAGTTAAAGTCTTTGATGCAGGACTTGAGCCCATGGATTTTTCCAATGGTGCTGTTGCAGCAAAAGTTATTAATGACTGGGTGGAGAGCAAGACTAACAACA<br>AAATCAAGGATCTCATATCAGAAGACTCTCTCAATGCCCTGACTCGACTTGTAATTGTCAATGCTCTCTACTTCAAGGGTAAATGGAAGCATCAGTTTAAGCCCCATAACACAATGGACAAA<br>CCATTCTATGTGAAGAAGGACACTACTGTGGATGTTCTATGATGTATATTGAAGAACAATTCAGATATGGGGAGAGTGACAAATTAATGCACAGTTACTGGAGATGCCGTATGAAGGCG<br>ACGAGGCGAGCATGGTGATCGTGCTGCCCAAGGACATCGAGGGTCTCGACACGGTCTCAAGCAACTGGCCTCGGGCGTGCACCTCGTCCAGGAGCTGAACAACATGATCTCCACCAA<br>GGTGACGGTCACCGTTCCCAAGTTCAAGATAGAGACCGAGATCGACCTTAAGGAACTGCTGCCTAAGCTAGGCATCAAGGCCATCTTCGACGAAAAGAACTCTGGCCTAACCAAGATCT<br>TGGACAGCACCGAGCCCTGTACGTGTCCAAGGCGATACAGAAAGCGTTTCATCGAGGTGAACGAGGAGGGTGCGGAGGCGGCTGCGGCCACCGCGATGAATATTATGATGTGTTGTGC<br>AATGGTGGACGTCGCCCCGTGCCAGTATTCAGTGGGATCGACCTTTCCTCGCGGTATCCAAGCTCACGGAATACTTTACTTCTGGCCGTACACAGCGGGAACGAATAA | <u>MSTFLLTFLFFIFSTNQIS</u> STNMDSAAVSSAVAKFSMQFCNE<br>LDKSQNVVSSPLSAEILLALLSLGSSEPALPELLGAIGFQDTD<br>AIRSSFSLVSSRLKSVKGVTLDVANRVYLQQGHEDLPKLKDD<br>AVKVF DAGLEPMDFSNGAVAAKVINDWVESKTNNKIKDLI<br>SEDSLNALTRLVLVNLYFKGKWKHQFKPHNTMDKPFYVK<br>KDTTVDVPMMYIEEQFRYGESDKLNAQLLEMPYEGDEAS<br>MVIVLPKDIEGLD TVLKQLASGVDLVQELNNMISTKVQVTV<br>PKFKIETEIDLKELLPKLGIKAIFDEKNSGLTKILDSTEPLYVSKA<br>IQKAFIEVNEEGAEAAAATAMNIMMCCAMVDVAPVPVFT<br>ADRPFLAVIQAHGILYFLAVHSGNE |
| CpSPN3  | chr3 | ATGACTTTAATGCTGTGTTTAATACTTTTTGTGCTCCACTGTCACAATGCGACGTGGTTCGGACCAACAAATCCTCCAAAGTGATTTCGGAACCCCAGCGGGCTACGCTGGCCCTCTCCC<br>CGCAGCCCAACCGGGCAAGCCAACACTCGGAACAAATGAGACCCTGGTGGACCATGATTATTGGGACTCCGACGATTATTATGTGCAGTCGCCGGCCGACTACGACTCGTTTGATTGGA<br>CGGTTACTAAGCGCATAGCGGCATACTCAGAGGAAAACTTCTACTTTCGCCTTTAGGCTTGAAACTAGCGCTGGCCATCTTAAGTGAAGCAGCGACTGGCCCCACTCAAGCCCAGTTGG<br>CCTCGGTCTAGGCTTTGACGTCAATAGAACCGTTGTTTCGGACTAAGTTCTCGTCCATCATATCTTCTCTCCAGCTAGCAAATCCAACTACACCCTGAACGTTGGCAGTAGAATCTACGTA<br>GATAGCACAGTGCTGAGAGACAGCGTTCTCTTCGATTGCTGAAGAATTCTACAAAATGAGCTGAAGAAGGTGGACTTCCGCCTCCCCGCGGAAACTGCGGCCCAAATCAACGGAT<br>GGGTCTCCAATTTGACTCACGGGAATATACCTAATCTAATCGATGAAGACGAGGTGAAAGGCAGTATAGTCTGGTCTTAACGACCCTGTTCTTCAAGGGCACCTGGAAGCACCAAGTTCA<br>ACCCGAACACTACCAAACCAGGGCCTTCTACGTGACACCGACTGTACAAAAACAAGTGCCCTTCATGAATGTAAAGGACAAGTTTTATTATGCAGAGTCAGCGAAATATGACGCAAAGA<br>TTTTGAGGATGCCATATTTGGGTAAAAAGTTCTCCATGTACATAGTAGTGCCGAACCTCCTGAAGGGCCTTCTCGAGTAATGGACTCGCTGAGCGACCTGCGCACGGAAATGCTATACCT<br>CGCCGAGCGCACGGTTGATGTACGCTCCCGAAATTCAAGTTTCGACTTCACCTCCATATTGGATGGAGTCTTGAAAGATTGGGCATTTCGGCAAGCGTTTGAAGACACGGCATCCTTCCC                                                                                                                | <u>MTLMLCLILFVAPLSQC</u> DVVPDQQLQSVFGTPAGYAGPLP<br>AAQPGKPTLGTNETLVDHDYWDSDDYVQSPADYDSFDW<br>TVTKRIAAYSEENFLLSPLGLKLALAILTEAATGPTQAQLASVL<br>GFDVNRTVVRTKFSSIISSLQLANPNYTLNVGSRIYVDSTVSE<br>RQRFSIIAEFEYKTELKKVDFRLPAETAAQINGWVSNLTHG<br>NIPNLIDEDEVKGSIVLVLTTLFFKGTWKHQFNPNNTTKTRAF<br>YVTPTVQKQVPFMNVKDKFYAESAKEYDAKILRMPYLGGKF<br>SMYIVVPNSLKG LPRVMDSLSDLRTEMLYLAERTVDVTLPK<br>FKFDFTSILDGVLKDLGIRQAFEDTASFPG LARGQSPQNR LK                           |

|        |       |                                                                                                                                                                                                                                                                                                                                                                                                                                                                                                                                                                                                                                                                                                                                                                                                                                                                                                                                                                                                                                                                                                                                                                                                                                                                                                                                                                                                            |                                                                                                                                                                                                                                                                                                                                                                                                                                                                                                        |
|--------|-------|------------------------------------------------------------------------------------------------------------------------------------------------------------------------------------------------------------------------------------------------------------------------------------------------------------------------------------------------------------------------------------------------------------------------------------------------------------------------------------------------------------------------------------------------------------------------------------------------------------------------------------------------------------------------------------------------------------------------------------------------------------------------------------------------------------------------------------------------------------------------------------------------------------------------------------------------------------------------------------------------------------------------------------------------------------------------------------------------------------------------------------------------------------------------------------------------------------------------------------------------------------------------------------------------------------------------------------------------------------------------------------------------------------|--------------------------------------------------------------------------------------------------------------------------------------------------------------------------------------------------------------------------------------------------------------------------------------------------------------------------------------------------------------------------------------------------------------------------------------------------------------------------------------------------------|
|        |       | CGGCCTGGCTAGAGGGCAGTCTCCACAGAACCGACTGAAGATTTCCAAGGTTCTACAGCGCTCCGGCATCGAAGTCAACGAGCTGGGAAGCGTTGCGTACTCTGTACAGAGGTGTCGCTAGTAAATAAGTTTGGCGAGGACGAATACAGCGCCGGAGAGGTGATCGCCAACCGACCATTCTTGTTCTTCATAGAAGATGAGGCCACGAGACAACCTGCTGTTACCCGGGCGGGTGT<br>CGGACCCTCTTGTTGGCCACCGCGGAGTTCAAAGCGCACACACCCAGTGCGTAA                                                                                                                                                                                                                                                                                                                                                                                                                                                                                                                                                                                                                                                                                                                                                                                                                                                                                                                                                                                                                                                                                                     | ISKVLQRSGIEVNELGSVAYSVTEVSLVNKFGEDEYSAGEVIA<br>NRPFLFFIEDEATRQLLFTGRVSDPLVATAEFKAHTPSA                                                                                                                                                                                                                                                                                                                                                                                                                 |
| CpSPN4 | chr2  | ATGCTTATATTTGTGCTCGAATTATGCGCGTGTTTTGTGTTGTGTTTCGGGCAGAATCAAGGAATTAAAGGACACGATGAACCGGAATATCCCACGAACTTACACAACGGCCTCAGCGAG<br>GCGACGGGGAATTTCTCAGTGGAGCTATTATATCATGCAGCAAAAAACAAGGGAAGCAGAATCTCATATTGTGCGCGATCACAGCGTGGACGGTGTTGGCGGTGACGTGCGAAGGCG<br>CACTGGGCAATACGCGGACTCAACTGGTCTCGGCCTTACGAATAAAAAGAAACCGGACGGTCACCAGACATGACTTCCAAGAAATCGCGCGATGGCTAGTCGTAAACACAACCTACGGTG<br>CATCTTGCTAAATTCAATGGAATATTTGTGGACAAGTCTAAATCTCTGGAAGATGACTTCCGTCAATCTTCCAAAACATTTTATGATACGCAAACCTGTCGATTTAGACTTCAAAAACAGCGC<br>AGCAACCGCCGCCACCATCAACGGAGCCGTGTCAACAGCAACCAAGGCAGAATTCTAAATTGGTTGATGAAAGTAATTTGAGTGATGCACAGATGATCATCACGAGTGCAGTATATTT<br>TAAAGGCCAGTGGACTGCACCTTTTAATGTCTCCTCTACAATAAACAAAATTTTATAATAGTAGTGGGATGAAAATTGGGGAAGTGAACATGATGTACAATAGATACACATACCCATTG<br>CTAATATTAAGGAGATTCAAGCAAGAGTAATTGAGTTGCCTTATGGTGTTGAAAATCGTCTGTCCATGCTATTAATGCTGCCAAATCCTGGTGTTACTCTAGAAGATATGTTCTTAAACTTCA<br>AAAAAGTACCTCTTGATACTGTGTTTCAAGAGCTGAAACTCTCTCAAGAAGAGTATAGTGATGATGAAATAGATTGTTTCATTCTCGCTTCAAAATTGATTCAAGCATTGAACTGAATGAA<br>ATATTGAAAGAGGGAATGGGAATATATGATCTGTTTGACCCTGTGAAAGCCAATTTGGGCCGCTTGGCTCGGGTGCCCATGTATGTGACTAGGGTTATCCATAAAGCAGAAATTGAGGTT<br>ACAGAGGAAGGTACAACAGCGTCTGGGGCTACAGCTGCAGAGTTTGAAACCGGATTGGAGTTATAAGATTGAAGCCAACCGGCCTTTTAGTTACCTTATTGTGAAAAAGTCACAAA<br>CACAATCGTTTTCGGAGGAGTGTAACACAGCCGATTTTGTACTGA                                                                         | <u>MLIFVLELCACFVLCFGQ</u> NQGIKGHDEPEYPTNLHNLSEA<br>TGNFSVELLYHAAKKQGKQNLILSPITAWTVLAVTSEGALGN<br>TRTQLVSALRIKRNRVTRHDFQEIARWLNVNTTTVHLAKF<br>NGIFVDKSKSLEDDFRQSSKTFYDTQTVDLDFKNSAATAATI<br>NGAVSTATKGRIKLVDESNLSDAQMIITSAVYFKGQWTAP<br>FNVSSTTKQNFYNSSGMKIGEVNMMYNRYTYPFANIKEIQ<br>ARVIELPYGVENRLSMLLMLPNPGVTLEDMFLNFKKVPLDT<br>VFQELKLSQEEYSDDCIDCFIPRFKIDSSIENEILKEGMGIYD<br>LFDPVKANLGRLARVPMYVTRVIHKAIEVTEEGTTASGATA<br>AEFANRIGVIRFEANRPFSYLIVEKVTNTIVFGGVYQQPILY                                |
| CpSPN5 | chr23 | ATGAGATTCACAGTTTTAATATTGTTAACATCATCATGTTACTGTGATGTGGAATTCAGTGAACGACCAAGAAACTTTAGCATAGAAGTCTTTATCATACTCAGAAGCAAACCTGGTGGACA<br>TGTTGTGATATCTCCTTTTGAATTTGGACACTTATGACCGGTTTAGCCGTGGGTGCGACCGGCGACAGCTTCGAGCAAATAAGAGTGCGCTTTTATACTTCCCAGGAGCCTTAAAACCGTC<br>GTATGTGGATCTAAACACTTGTCTAAATCAGTGCTGAAACGGACCTCCGATGGAGTATCTATAACGAGTAAGAATTTCTATTTCGCTGATGATGATTCTTACTTAAACCAGCATTTAAGCAG<br>ACTATTACTGAAGATTTGACGCCACTGTCAAAGTGCTTGATTTTAAAGATTCTAACGAAGCTGCAGCTAAAGCAAACAATTTATACAAAACCTCCGGTGCTCGAGTTACTAATGTACTAAC<br>TTCAGAAGATTTTGAACAATCAAGAATGATTTTGACAAACGTGATAACTTTTAAAGGACTATGGACATCGCCTTTCAATGCAAGTCATACAACCTCTGAATATTTCTATAACGAAAACAAAG<br>AGATAATAGGCGAAGTGAATATGATGCATCAAAAAGGAGAATTTCCATTATCTAACATAATAGATCTTAAATCATTCGCTGTGAACTGACTTATGGAACCTGATGCGGCATATTCCATGCTAG<br>TGATCTTGCCCTCATCCAGGTGTTAAAGTTGAAGACGTTTATAAGAAGTTTGAAAAATATCACCATACCTGACATAATAGCGAGACTCCAAAACGATGAAAAGGAATACGGTTTAGATGAAGT<br>TGAAATTAATACCTAGATTCAAAATAAGCACGAATATAGTTATGAATAGACCTTTAAACGATATGGGTGTTTATGATATTTTCGATCCAGAATATGCTAGTTTTCAGAGAGCAACAAATGA<br>GAGTATTTATGTGTCGGCCATAGTTCATAAAGCAGACATAGAAGTAAGTGAACAGGGACCGTTGCGTCAGCGGTATCTACAGCGTATTTAAGTAATAGATTGGAACAACCTAAATTGATT<br>GCTGATAGACCTTTCCTGTACTTCATCATTGAGAAGTCGACAGCTACTGTGATTTTTCGGGGCATTATTCTAAGCCTTCTTTGTACTGA                                                                                                                                       | <u>MRFTVLILLTSSCYC</u> DVEFSEPRNFSIELLYHTQKQTGGHVV<br>ISPGIWTLMTGLAVGATGDSFEQIRVAFILPRSLKTVVCGS<br>KHLKSVLKRTSDGVSITSKNFLFADDDFLKPAFKQTITEDF<br>DATVKVLDFKDSNEAAAKANNFIQNSGARVTNVLTSDFE<br>QSRMILTNVITFKGLWTS PFNASHTTLEYFYNNENKEIIGEVN<br>MMHQKGEPPLSNIIDLKS FVCELTYGTDAAYSMLVILPHPG<br>VKVEDVYKKFENITIPDIIARLQNDEKEYGLDEVEIKLPRFKIS<br>TNIVMNRPLNDMGVYDIFDPEYASF SRATNESIYVSAIVHK<br>ADIEVSETGTVASAVSTAYLSNRFGTTKLIADRPFLYFIIEKSTA<br>TVIFAGIYSKPSLY                                                 |
| CpSPN6 | chr1  | ATGTTCAAAATAGTAGCCCTCGGGTTGCTTATAATTGCGACGGTGACTGGTCAATGCTTCTATAAAGATGATTAGCTAAGAACTGGACCCCTGAGGCTCGCACGTCTCTTTATAGGGGCC<br>AATTGGAGTTCACCCTAAATTTGTTTAACTCCATTAATGACGCGTATCCACCGACAACATATTCTTTTCGCCTTCTCAGTATACCACTCTCTACTGCTAGCTTACTTTTCTGCTGGGGGCCA<br>GACGGAAGCGTCTCTGAAGGAGTCACTACAGATAGAAAAATCTTTGGATAAAATCAATTTGATATCAGCATACAAGGTAGACCGCCGGTCCCGCTTGACGAATAACAACAGCGCCAGCTA<br>TGAGTTCAACAGCGCCAACAAAATGTTTCATCGATGAAACGCTCGACGTCAGGCAGTGCTTGCTCGACATCTTCGAGGACGAACTAGAGAGACTTAATTTCCACGAAACGCCCTCGGAAG<br>CACGCGAGCACATTAACAAGTGGGTGGCCGCGGCGACGAAGAACCATATCCAGGCGTTGATCCCGGAGGACGGCATCACGCACACCACGAAGCTGGTGCTCGCCAACGCCGCTACTT<br>CAAAGGCGTCTGGGCCTCTAAATTCCCCGCAGAAAGGACAAAGAAAGAGGCTTTCTTTGTTTCTGAAACTCTTCAAACGCTGGTACCGTTTATGAAGCAGAAAGGCACTTTCCATTTCAT<br>GGTGAGCGAAGACCTCGGTGCACAGATTCTGGAGCTGCCCTACAAAGGCAACGACATCAGCATGTACATCCTCCTGCCGCCCTACTCTATGAAGGAAGACATGACAAATCGTTGCAAGC<br>CATATGGAGAGTTTGCTTGCCCTACTCTATGCAAAATTTATTAGTGTGAGATTCCACAGGTGTGAAGAACATCATAGCCAACCTGACACCCCAGCGCGACTAGCCGCCGTAGTGGAGG<br>AAAGCTACATGGGCCGCGAGGTATCGTCGAGATCCCCAAGTTCACCGTTGAGAAGAGCCTGCCCCTGAGGCCAATCTTGAGTCTCTGGGAGTAGGCGACTTGTTCAACAGCACCTCC<br>GACTTCACGACGCTGACGGAGGACCAAGTCAGCTTCGACGATGCCGTCCACAAGGCCAAGATCCAAATCGATGAAGAAGGAACCGTGGCTGCAGCGGCAACGGCCATCTTCGGGTTC<br>CGGTCATCGCGGCCCGCGGAGCCCACCCGCTTCGTGGCCAACCTCCCTTCGTGTACCTCGGTACGAGCGGCCACCAACTCTGTCCTTTCATGGGCGTCTACAGGGACCCCTAAGAAG<br>TAA | <u>MFKIVALGLLIIATVTG</u> QCFYKDDSAKKLDPEARTSLYRGQLE<br>FTLNLFNSINDAYPTDNIFFSPFSVYHSLLLAYFSAGGQTEAS<br>LKESLQIEKSLDKINLISAYKVDRSRLTNNNSASYEFNSANK<br>MFIDETLDVRQCLLDIFEDELERLNFHETPSEAREHINKWVA<br>AATKNHIQALIPEDGITHHTKLVLANAAYFKGVWASKFPAER<br>TKKEAFFVSETLQTLVPFMKQKGTFFHFMVSEDLGAQILELPY<br>KGNDISMYILLPPYSMKEDMTNRCKPYGEFAWPYSMQNLL<br>VSDFHRCEEHHSQPDTPARLAAVVEESYMGREVIVEIPKFT<br>VEKSLPLRPILQSLGVGDLFNSTSDFTLTLEDQVSFDDAVHK<br>AKIQIDEEGTVAAAATAIFGRSSRPAEPTRFVANFPFVYLVY<br>ERPTNSVLFMGVYRDPKK |
| CpSPN7 | chr2  | ATGTGGAAGGTCATAATAGCCGCGTGCACGAGCCTGGTGGTACCCTCGGTCGATGATCGGGTCGATTTCTACCCATCAATCAATTCGCTCTAAGACTCTTAGACAACGCATATGCTT<br>TTCAAGAGAACTTTGGGCGACAAAATTTTGCTATTTCTCATTATCAGTATGGAGCGTTTTCTCGTACTCGCCGAAGGATCGGCAGGGGACACCTTCCAGGAACATAAGGAACCTC<br>AGCTACCTCAGGATTTGAGGGCAACTCAAGAGCTACATCTTGCGGCGGATAGCGTTTTAAGAAGCAACGACCCTGATCTCGTGATTACAAAACAAGCAGCCTTGTTCCCCGAATGTTTCAT<br>TAGAGATACACCAAGAGTTTTGTCAAGCAGCTAACATGTACAGGACAGAAGGACAAATAAGAAACGCAGTGAAAGAAGAATTTCTTAGAGATTTAAGGCTGCTGATAGTAGACGCTTTG<br>TACTTTAAAGCAAATTGGACACATCCTTTGACCCAACCGCAACCAGAGAAGAAGATTTTTACAATGGCCAAGGGAAAACAATTGGACGAGTAAACATGATGTTCCACAAAGCATCTCAC<br>AATGTAGGAGACTCAAACCTCAATAGGAGCACAGATTCTTGAAATGACATATGGGAAACATGAAGAATTCTCAATGTTGATCCTCTTACCTTTTGAAGGAATGCCACTGAAAACACTACTTA                                                                                                                                                                                                                                                                                                                                                                                                                                                                                                                                                                                                                                              | <u>MWKVIIAACTSLVV</u> TAPVDDRVD FSPINQFALRLLDNAYAF<br>QENFGRQNF AISPLSVWSVFSLLAEGSAGDTFQELMKELQL<br>PQDLRATQELHLAADSVLRSDPDLVIHKQAALFPECSLEIH<br>QEFCQAANMYRTEGQIRNAVKEEFLRDLRLLIVDALYFKAN<br>WTHPFDPATREEDFYNGQKGTIGRVNMMFHKASHNVG<br>DSNSIGAQILEMTYGKHEEFSMLILLPFEGMPLKTLLSNLVT                                                                                                                                                                                                                      |

|         |       |                                                                                                                                                                                                                                                                                                                                                                                                                                                                                                                                                                                                                                                                                                                                                                                                                                                                                                                                                                                                                                                                                                                                                                                                                                                                                                                                                                                                                                                                                                                                                                                                                                                              |                                                                                                                                                                                                                                                                                                                                                                                                                                                                                                                                                                                            |
|---------|-------|--------------------------------------------------------------------------------------------------------------------------------------------------------------------------------------------------------------------------------------------------------------------------------------------------------------------------------------------------------------------------------------------------------------------------------------------------------------------------------------------------------------------------------------------------------------------------------------------------------------------------------------------------------------------------------------------------------------------------------------------------------------------------------------------------------------------------------------------------------------------------------------------------------------------------------------------------------------------------------------------------------------------------------------------------------------------------------------------------------------------------------------------------------------------------------------------------------------------------------------------------------------------------------------------------------------------------------------------------------------------------------------------------------------------------------------------------------------------------------------------------------------------------------------------------------------------------------------------------------------------------------------------------------------|--------------------------------------------------------------------------------------------------------------------------------------------------------------------------------------------------------------------------------------------------------------------------------------------------------------------------------------------------------------------------------------------------------------------------------------------------------------------------------------------------------------------------------------------------------------------------------------------|
|         |       | GCAATTTAGTTACGTCTCCATTAGACTGGATAACAGACTTCAAACGAGACGATAAACGGCCGGAAATTGATGTGTTATTCCCCGTTTCAAATATCTTCTCAGATTGATTTAATTCCTGCTT<br>TAAAATACACCGGAATTCATACAATTTTCGACAGTGAGAAGGCGCAGTTGCCTGGTATTTCTGACAGTCCTTTATTTGTATCTAAACAATTCAAATGTAGAAATAGATGTAAAGAAGAA<br>GGTACAGTTGCCGCCGAGCTACAGTGGTTGGGTAGAGAATCGATTCTTTCCAGCGGTTTGAGGCTAACAAAGAGTTGTTTTCATGATCACGCATAGGAAATCAAACGTTATCTTG<br>TTTGCCGGTGTGTACAGTGACCCTGCTGTTGTGTGA                                                                                                                                                                                                                                                                                                                                                                                                                                                                                                                                                                                                                                                                                                                                                                                                                                                                                                                                                                                                                                                                                                                                                                                                                                          | SPLDWITDFKRDDKRPEIDVFIPRFKISSQIDLIPALKYTGHTI<br>FDSEKAQLPGISDSPLFVSKTIQNVEIDVKEEGTVAAAATVV<br>GLENRFLSQRFEANKEFVMITHRKS NVILFAGVYS DPAVV                                                                                                                                                                                                                                                                                                                                                                                                                                                   |
| CpSPN8  | chr19 | ATGATTCTTTTTGTGCTCAAATTGTGCGCGTGTGTTGTGCTGTGTTAGGGCAGAATCATGGAGTTAAAGAACCGGTATATCGAATGAATTTAGCTAAATTCAGTGAGTCGACGGGCAATT<br>TTACAATAGAGTTGTTATATCACGTGGCAAAACGACAACCGGACCAAACTTCGTTGTGTCCCCGTTTCGACAGCTGGACAATGCTAGCGGTGACTTATGAGGGCGCAGTGGGTAATACCA<br>ATGAAGAACTGATCTTGGCCTTACGATTTCGCCGAAAAAGCCCTCGAACAAACAGTTAGATATTACTATCAAGAAATCGCGCAATGGCTTGTCGTCAACAGAACACAGCCCAATTTACAAA<br>ATTCAGCGGAATATTATGACAGGGTATGGACTGGAATGGATAATGACTTCCGTCACATTGCGGAGGAGATTTATAATACAGAAGCAGTTGACTTACCGTTCAAACAAAGCAGCAGC<br>GGCCACCATCAACCGAGCAGTATCTCTAACTACCGAAGACAGGATTCCACATTAATTGATGAAAGTCATTGAATAACACACAGCTGATTATCGCCAGTGCTGTATATTTAATGGGCAGT<br>GGACTGCACCATTTAATGTTATTACAGTTAAACGAGATTTCTATAACAGTATTGGGGAGAAAATTGGTGAAGTGAATATGATGTATAATAGATACACATACCCGTTTGCGAATATTAGTGAAC<br>TTCAAGCTAGTGTGATCGAGCTGCCTTATGGTGTGAAAACCATATGTCTATGATTTTAATTCTGCCAAACCCCTGGTATGACTCTAAAAGATATGTTCTTAATCTTCCTCAAAGCAAATCTTAA<br>GACAGTATTTCAAGAGCTGAAAGTCTCTCAAGAAGAGCGTGGTGATGTTGAAATAGATTGTTTCATCCACGCTTCAAATTTGTTCAAATATTGAATTAAACGAAATTTTAAAAAATGGT<br>ATGGGAATACATGACCTTTTTGACCCAAAGAATGTCTTCTTGCTCGCATGTCCCGGTGGCCCATTCGTGGTACAAGGGTCATACATAAAACCGAGATTGACGTAAGTGAAGAAAGCAGC<br>ACACCATCCGGAAATATAGCTCCAGAATTTGCAAATGACAGTAAAGTTCTAATTTTTGAAGCTAATCGGCCATTTAGTTATTTTATTGTGGAAAAACACACAGACACTGTTGTTTGGCAGG<br>AGTTTACCGAAAGCCTATTTTATATTGA                                                                                                                                                                                                                                                                                                                                       | <u>MILFVLKLCACFVLC</u> LQNHGVKEPVYRMNLAKFSESTGNF<br>TIELLYHVAKRQPDQNFVVS PFAAWTMLAVTYEGAVGNTN<br>EELILALRFPKRSPRTTVRYYYQEIAQWL VVNRTTAQFTKFS<br>GIFMDRVWTGMDNDFRHIAEEIYNTEAVDLPFKNKAAAA<br>TINRAVSLTTEDRIPTLIDESH LNNTQLIASAVYFNGQWTAP<br>FNVITVKRDFYNSIGEKIGE VNNMMYNRYTYPFANISELQAS<br>VIELPYGVENHMSMILILPNPGMTLKDMFLIFLKANLKTVF<br>QELKVSQEERGDVEIDCFIPRFKIVSNIELNEILKNGMGIHDL<br>FDPKNVFLPRMSRWPIRGTRVIHKTEIDVTEESSTPSGNIAP<br>EFANDSKVLIFEANRPFSYFIVEKHTDTVVLAGVYRKPILY                                                                                                               |
| CpSPN9  | chr2  | ATGGCCACTTATTTGTACTTGCTGGCCATCTTCTGCCTCCGATATTAGGGCAGTGTTGCGTCGAAAAGGCCGGTCATAGTTTCAGTCGCGCGGTTTACGAGTTTTCTCTGGATTTAATACA<br>AAGAGTGGGACAGGAAAACGATAACCATTTCGTCACGTCACCATTCTCGCTATGGACTGTTCTAACAACAGCATCTTTAGGGGGCCGAAGACGAGACCCTTGCGGAAATGAAGCGAGTAC<br>TCCGCCTTACCATTACCCGTGCTTCAACGACAGGTACCTAGAAATCGTGAAAGGGATCACAGTGTAACCTCGAAGACCACACTGGAGAGAAGTTCTGTGCTCTTCGTTGACAAGACT<br>GTTTCGTTGCTCGAATCTTTCATAGAAAACAGTGAGTGGCACC GGAGTGTGCGACGTCATGATCCTACCTTTCGACAAC TACAACAACGTGGCTACAAC TATAAATAATTACGTGAGCCAAG<br>CGACCCACAACACCATCCAAGAAATCGTGAATTCAAATGACATCGAAGGAGTCTATCTGCTTCTGCTCGACGCTGTTACTTTAAAGGAATGTGGAATATTCCTTTGAGCCCTCAGAAAC<br>TGAAGTCACTTCTTCTACGACGAGAGAAAACAACCTGTTGGAGATGTAAACATGATGTTCTCCATGCGGCAATATAATTTAGCATCCATTGATCAGCTACAAGCGAAGGTCCTAGAACTG<br>CCCTATGGAGATGGAGACCGTTTTTCCATGCTCATATTCCTTCCCTACCAATCCAGTTCTGTGGCCAAAGTCACAGACCAGCTGAAGAGAGTGACTTTAAAGTCCATATTCTACATTTTCCA<br>GCGTAACGGACGCGACACAGTTCAAGTTCAGATCCCGAGTGCTCAGTTCCCGCATATATCTGACTACAGTTTCTACATTTCGAATGTGGTG CAGAAGGCTGATGTGGAGGTGACAGAGG<br>AAGGGACGGTGGCGGCGGCGGCTCGGCGGCGGAGTTCGAGGCAAGACGCCTACCTGACTCCTTCCAAGCGAACAGGCCGTTCTGTGTT CATGATTGTGGACAAGTTGAACTATATTCC<br>GCTGTTCACTGAAGAAGATGGGACGGAGAGAAGCAGGCTGCGCGACAGCCTCACAGGATTTAGATAG                                                                                                                                                                                                                                                                                                                                                                                                                           | <u>MATYLYLLAIFLPPILG</u> QCSVEKAGHSFSRAVYEFSLDLIQRV<br>GQENDNHFVTS PFSLWTVLTTASLGAEDETLAEMKRVLR<br>HHYPCFNDRYLEIVKGITVYNSKTTLERSSVLFVDKTVSLLS<br>FHRKLSGTGVCDVMILPFDNYNNVATTINNYVSQATHNTI<br>QEIVNSNDIEGVYLLLLDAVYFKGMWNIPFEPSETEVTSFYD<br>ERNNPVGDVNMMFMSMRQYNLASIDQLQAKVLELPYGDG<br>DRFSMLIFLPYQSSSVAKVTDQLKRVTLKSIFYIFQRNGRDT<br>VQVQIPSAQFPHISDYSFYISNVVQKADVEVTEEGTVAAAA<br>SAAEFEARRLPDSFQANRPVFVMIVDKLNYIPLFTEEDGTER<br>SRLRDSLTGFR                                                                                                                                                 |
| CpSPN10 | chr3  | ATGCGAATACTATTTGTGCTATGCCTCGCGTGGGTCTGAGCAGCGCGCGGTGGGTGCGGCGCGGCCGAGCCCCGCCAAGACCACAGGCTTCGTCGGGGAAGCCACCAACCAACTAT<br>CCACTGCCATCTTTCAGGGTTACATCGACGATAATAAGAATATTGCATTCTCACCATTGGTTACTCTGCTATCCTCGCCATACTTGCCGAAGGCGCGACGGGTCAGACGAGGGAACAACT<br>CGTATCTGCCCTCCACCTCCCAGAGAATCCGAACCTTATTAGAAAAACATATCGATACATCATGGAAGACTGAAGAATACACACGAGTACAAATACAACCAACCTGAATTAAAGAATTATT<br>TCTACATCTATAAAAATTACACAATCAACGATGACTACAAGAAAATCTTAGAAGATTATTACCTTACAGATGTTAGATCCGTAGAAAGGTATAATGACGTAGACCACTTAAAGCCCGATGAAT<br>CTAATGATGATGATGAAACAATTGAAATTTCCGACAAGAAAGCTGCAGAAAAGTAACAAGAATGAAGAAATTGTAGACCTTGTTCCACCTAAAGAATCTGGTGAGAAGTTTATTTCTTTTG<br>CTGTAGAAGATAAACCTGAAAAAGTAGACATATCTCAAATTGAGTACAAACCCGCGAAGAATATTAAAGAAAAGATAAAGCTTGTA AAAACTTACCCAAAAAGGACGATTCCGGAGAA<br>GAAGAAGAGACTATGGTTGCTGTGCGAGGCTAGAAATCATGCGAGAAGCCACCACGTTTTGCAGGAAAAATCCGATATTGCGTCAAGTATATCGGTTAATACTGTCGGAAAGAAATC<br>GGAAAAAACTTCGCCATCAAACCTCTGATGCTTATCTTCAACGGGATGTATTTCCGCGGCGCGTGGAACAACCTTTCCTAAAGGTCGAGCCAGCTATGTTCTACACGTCCAACAGTGA<br>GAAAAAGCAAGTG CAGATGATGTGTACGAAGGGCATCTTCAAGACTGGCTCTCTTCTGCTGTTGACAGTTCAGCTATTGAACTGCCTTACGATGGCGGTGCGTACTCCTTGCTGATCGT<br>GTTGCCTCGCACCCGCGACGGTCTGACGCGGCTGACGGCTGATCTGCCGCGGCGCGCTCGAAGACATCCAGGACAGCTTGCGCGAGGAGGAGCTGCAGGTTTCGCTGCCCACATT<br>CTACGTGGAGACCACTACAAAACAGTTGCAGCCTTAGCCAAGTTCGGAGTGAGCAGCATCTTCAGCCGCGACGCCGAGCTGTGCGGTGTTTCTTCAGCGGAGGGACTCTTCGTGCAG<br>GAGCTGGTCCAGCACGTAGCGGTTGCGTGTGACAACGCGGACACCTCTGCGTCACAACGTGTCAGCAATTAACGCAGTCCAGGAGTCTCTTAAGAACATCCCATTGTCCAGCATCAAAGA<br>ACCACGCCGCTTCAGCGTCGACCGACCCCTTCATGTTCTTCATCATTGATCGCCTTGACAACTTGGTGGTTATTGCTGGAAAAGTTATAGACCCAGAAGCACCGACGCGGTCGAAATTTAA | <u>MRILFVLC</u> LAVGLSSARWVRRGRAPPKTTGFVGEATNQLST<br>AIFQGYIDDKNIAFSPLGYSAILAILAEGATGQTREQLVSAL<br>HLPENPNLIRKTYRYIMERLKNTHEYKYNQPELKNYFYIYKN<br>YTINDDYKKILEDYYLTDVRSVERYNDVDHFKPDESNDDE<br>TIEISDKKAAESNKNEEIVDLVPKESGEKIFISFAVEDKPEKV<br>DISQIEYKPAKNIKEKIKLVKTYPKKDDSGEEETMVAVEAR<br>NHARSHHHVLQEKS DIASSIVNTVGKKSEKSPSNSMLLIF<br>NGMYFRGAWKQPFLKVEPAMFYTSNSEKKQVQMMCTKG<br>IFKTGSLPGLDSSAIELPYDGGRYSL LIVLPRTRDGLRLTADL<br>PAAPLEDIQDSLREEELQVSLPTFYVETTTKPVAAALAKFGVSS<br>IFSRDAELSGVSSAEGLFVQELVQHVAVRVDNADTSASQLS<br>AINAVQESLKNIPLSSIKEPRRFSVDRPFMFFIIDRLDNLVVIA<br>GKVIDPEAPTPEI |
|         |       | ATGACTACTGTGAACCAAAACAAAATTTGCCTTCTTTCACCATGCAAGATTTTGCTAAGATCTTGACTACATAGGTGTTTTCTTAGCCTACCTTCAAAGTTTAGAGTGCATTGATAATAAG<br>AGGCCAGAAAATGCTCGTCTAAACTATTTGACACAGATCTCCTTAAATATACGACTGAAGACCGAAGTGGAATGTGGTGGTCTCCCCGGCGAGCATCAAATCGACTCTGGCTATGCTCC<br>TTGAAGGAGCAAGTGGAACACTGAAGTTGAAATAAGATGTTCTTACGATTGTCACCGAATAAAAATGAGTTCAGAGAACAACCTGAATATCTATCTATCAGCGTTACAATGCAATAATAC<br>TGCAGCCAAACTTCAAATGCTAATGGCGTCTTCGTGTGCAACAAATTGATACTGAAGAAAGAGTACGAGAGAGTCATAGAAAAAGTATACCTTACAAAAGTCGTCAATTCTGAATTTTCTG                                                                                                                                                                                                                                                                                                                                                                                                                                                                                                                                                                                                                                                                                                                                                                                                                                                                                                                                                                                                                                                                                                                                                | MTTVEPKQNLPSFTMQDFAKILDYIGVFLAYLQSLLECIDNKR<br>PENARLNYFDTDLKYTTEDRSGNVVVSPASIKSTLAMLLEG<br>ASGNTEVEIRCSLRLSPNKNEFREQLNIYLSALQCNNTAAKL<br>QNANGVFVSNKLILKKEYERVIEKVYLTQVILNFLDPVGS A                                                                                                                                                                                                                                                                                                                                                                                                       |

|         |      |                                                                                                                                                                                                                                                                                                                                                                                                                                                                                                                                                                                                                                                                                                                                                                                                                                                                                                                                                                                                                                                                                                                                                                                                                                                                                                                                                                                                                                                                                                                                                                                                                                                                                                                                                                          |                                                                                                                                                                                                                                                                                                                                                                                                                                                                                                                                                                                                                                                    |
|---------|------|--------------------------------------------------------------------------------------------------------------------------------------------------------------------------------------------------------------------------------------------------------------------------------------------------------------------------------------------------------------------------------------------------------------------------------------------------------------------------------------------------------------------------------------------------------------------------------------------------------------------------------------------------------------------------------------------------------------------------------------------------------------------------------------------------------------------------------------------------------------------------------------------------------------------------------------------------------------------------------------------------------------------------------------------------------------------------------------------------------------------------------------------------------------------------------------------------------------------------------------------------------------------------------------------------------------------------------------------------------------------------------------------------------------------------------------------------------------------------------------------------------------------------------------------------------------------------------------------------------------------------------------------------------------------------------------------------------------------------------------------------------------------------|----------------------------------------------------------------------------------------------------------------------------------------------------------------------------------------------------------------------------------------------------------------------------------------------------------------------------------------------------------------------------------------------------------------------------------------------------------------------------------------------------------------------------------------------------------------------------------------------------------------------------------------------------|
| CpSPN11 | chr3 | GATCCGGTAGGGTCTGCTGCCATCGTAAACGATTGGGTTGGCAACCAGACCAGGGGGCTAATACGATCCCTAATAGAACCTGCCACATCCCCCATCATCCGACGTTCTCGTCATCAACGCTCTGTACTTCAAAAGCGCCTGGCAGCACGCCTTCGATCGCAGCCTAACAAAGGTCTGCCTGTTTTCGCGTCCAGGGCGCTTGTAAGAAGCAAGTCGCTATGATGGAGATCAGTACTGAGCTCAACTACGCGTTCGTTGACAACCTTGAGGGCTCATGCCGTTGAATTACCTTATGAGGGTGGCCGTTATTCTATGGTGTTATTAGTACCGCAAGACCACGACGGCTTGGCAGGACTGATAAGGGACTTGCCGTACATGAGCCTGCCGAGATATGCAAGATGATGGAACCGTCTCACGTGCAGTCTCTGTTGCCGAGGTTTACCGTGGACTATAGCGAGGATATGGTCGGACCACTTAGGAGTATGCGAATCACAACCTCTTCTCGTCAAAATCCAACCTGTCTGGAATCATCGAAGGTGGCCCCGCCAAATCAACCCTTATACCACAGGGTGTACGTATCCGTTGACGAAGACGGAAACAGTGCCGCTGCAGCTTCTGCTGCCCTTGTCGTGCCTTTAATAGAAGGGAATGTGCAACTTGTTGGTGGACAAACCTTTGCGTTCTTTATAAAGGACAATACTTTGGGTTTGGTTCTTTTGAAGGAAAGATTGAAGAGCCACATGAATATGTGGCACCGAAAAAGGGTTCAGAGAACAAATTTGTAAAAAGCAGTCGGAATAGTTTGGGACTCGCTTCTGA                                                                                                                                                                                                                                                                                                                                                                                                                                                                                                                                                                                                                                                                                                                                                                                                                                                                                                                      | AIVNDWVGNQTRGLIRSLIEPAHIPSSDVLVINALYFKSAW<br>QHAFDRSLTRSACFRVQGACKQVAMMEISTELNYAFVDN<br>LRAHAVELPYEGGRYSMVLLVPQDHDGLAGLIRDLPYMSL<br>PQICKMMEPSHVQLSLPRFTVDYSEDMVGPLRSMRITTLF<br>SSKSNLSGIIEGGPAQINHLYHRVYVSVDDEGTVAAAASAAL<br>VVPLIEGNVQLVVDKPF AFFIKDNTLGLVLFEGKIEEPHEYVA<br>PKKGSENN FVKSSRNSFGTRF                                                                                                                                                                                                                                                                                                                                               |
| CpSPN12 | chr3 | ATGAGGTTTTCAGATTTTATTGACAATAGTCTGCCTGACTTTAAGAATAGATTCCCAAAGTCTGAAGCCGACACGGACTTCCAATAGATATGAACCTGGATCTGAACAGTTATTTTTCGAAGATACTTGCCAGGAATTATAATAGAAATAACGTGAATCTGAGTAGTGACAACGCAAAAGCCAGCTTACAACAGGCGCAGACGCAGTCCCTTAATGACAGTCACTTGCGAGCTGATCACCAAGGACAACGAAACACAAGAAATGGTAACAAACAGGATGAAAGATTAAAGATCGTAAATAAAGCAGTAATTCAAATGGTAACTTACAGAATCAGTACCAAACAATTAATCAAAACGATAATACACAGAGTCAAAACCAAAATCAATTTAATCCGAATTTGGACCAAAATCAAACCTACCAGTTTCAACAAAGCATAGAACTTGACCCGCTTTGCAATCAAGTCAAGATTATTATTCCAAGCAAAATTTAAAGCAATCAATATCGGTGGTATTGACAACAGCTATACAACCTCGAGCCAACGTCGTTCCCTGTGTCTCAGAGTTCACAGCTGTTGAATATGACCAATGATATAAAACTTGCGTCTGCGGTTATCTCACATGTTGGTATTTTCATGATGAAGAGTGCAAGAGAAAAATCATTCAAACGTTGTGGTTTTCCCAACGTCGTGTGGTGAATATGCTGGCGCTCCTGCAAGCTGGCGCAACGGGCGTGACTCAAGAACAGGTCTCGAATGCATTGAGATTGTCTCCAGAGAAGTCAGCAGAAGCATTTGACTTATGAATACCGAGTTGCGGAAGCGAAGTACCGAACGAAACATTTTGCGATCGGCGAGCAGTATTTTCGCAGCAGATTCAATTCGAACTTAGTCGTGATTTCAAGAATATTGCCATTCAAACCTTTGGCAGCGAAGTATCAAGAATCAGCTTTGATAACCCAAATGCTGCTGCCCAGAAGATAAATCTTGATTGCTAGTAAGACAAATGACCAGATCGACAGGCTGGTATACCAGATTCATCGGTGTCAATACTCAACTCGTGCTTGCCAATGCGATATACTTCAAGGGTATATGGGAGACCATGTTCAAACCGTCAGAAACGTCAGTGCAGGACTTCAATCTAAGCAATGGTAGCAAAAAATCTGTTCCATTGATGACGCTGCGGAGTGGCTTCAGGGCAGGTGTAGACAAGGCTAATAAAGCCCTGTTATCGTTTTACCTTTTGAGAACAATGAATATCCCTAGTCATGTTGCTGCCAGTTCTGGCGCCGACGTATCAGCTGTGTTGACGTCGCTCGACGGTGAACTCTAGCAAACTACCAGAAATTTACGGCGCCAGGATGTTCTTCTCGAAATACCGAAATTCAGTGTCCGTAGTAATGCTAATCTGCAACCGATTTTCGCGAAGATGGGAATCACAAAGATGTTTTCTCCAACATCGGAACTCAGTCACATCGCCTGTACCGTGCCAATTCGCCCAAGTCTCCTCAGCGGTTCACTCCGCCATGATGTCAATAGATGAACGGGGTGCCACAGCCGCCGATCTACAGTGGTTGCAGTTGTAGCATTGTCATTGACAACCCGTCGGTTGTGTTTCAGAGCAGACCGGCCGTTTTTAGCTGTGCTGTGGGATAATCAGCTAAACGTGCCTTTGTTTCATGACC AAGATTGAAGACCTTCACTGTAA | <u>MRFQILLTIVCLTLRIDS</u> QSLKPTRTSNRYEPGSEQLFEDNL<br>PRNYNRNNVNLSSDNAKSLQQAQTQSLNDSHLRADHQ<br>GQRNTRNGNKQDERFKIVNKAVIQNGNLQNQYQTINQN<br>DNTQSQNQNQFNPNLDQNSNYQFQQSIELAPPLQSSQDY<br>YSKQNLKQSNIGGIDNSYTTTRANVVPVSQSSQLNMTNDIK<br>LASAVISHVGIFMMKSARENHSNVVVSPTSVMNMLALLQA<br>GATGVTQEQQVSNALRLSPEKSAEAFRLMNTELRKRSTERNI<br>LRSASSIFAADSFELSRDFKNIAIQNFGSEVSRISFDNPNA<br>QKINSWIASKTNDQIDRLVSPDSIGVNTQLVLNANAIYFKGIW<br>ETMFKPSETSLQDFNLSNGSKSVPFMTLRSGFRAGVDKA<br>NKALVIVLPFENNEYSLVMLLPVGADVSAVLTSLDGETLAN<br>YQNLRRQDVLLIIPKFTVRSNANLQPIFAKMGITKMFSP<br>TSELSHIGLYRANSPQVSSAVHSAMMSIDERGATAAASTV<br>VAVVALSFDNPVSVFRADRPFLAVLWDNQLNVPLFMTKIEDPSL |
| CpSPN13 | chr3 | ATGGATTGGAGGTCGCGAGTCTTCTGTTCTGATGTTCAATAGCGTCGCCATCTCTGAACATGAGGAAAACACAACGGATCCGAGCGTCACAGACCAACCACATGAGCAACAGTTATCCAACACAATCAACGAGTTGGGTTTCAAATTGCTCACTGAGGAGATGAAACGATACGCGGACACAAACATAGTTATGTCCCCTACTGGTATCGCAGGTCTCCTCGCGATGGTACTTCTGGGAAGTGCTGGCAACACGTACACGGAGCTGGCAGCGCGCTCGGGTTTTCCCAAGATATTCTCCGAAACCGCGCGCACACCAGAACAGTTCGGCTCGCTGCTCCAACTCCTGAACTCCAGCACCATACGCCGACGCCATATTGGTGGAGCCGCTACACGTATTCTGTCGGTTGTACAGAGAGTTCCTTCAACGCGGTACCAAGGCGACGCGCGCTGTGGAGTTTACCGACGCGCCCTTGCTAGAGACACCGTCAATGATTGGATCAAAAACCACACGAAAGGGGAAAATAGAAGATTTCTGAAAAGAACCCCTCCAGTGAGACAAGGGTTGTGTTGCTGAGCGCCCTCTACTTCAGCGGACAATGGACTCATCCCTTCTTGCCGGAACACACGAAGAAGATGGCGTTCAAGACTCCTACTGGCGACGTATGGCCGATATGATGTTGAACTTCGGACATTTCCAATACACATACTCAGCTGAAGATGGCGTGCAAATGATAGCTTTGCCCTACAAAGACAACACAACCACGATGTACGTGTTGAAGCCACTTAAAAAACTTCTTGAAGACCTCATGAGCCGCTAACTACTCGAGGATCGACCAACTCATCTCCAACATGACCAATGACAGAGCGGTATCAGATTTCCAAAAATGGACCTAAAAAACTCAATCCAGTTAGAAGACAGCCTTAAATCTATAGGTCTCAGCGAAATGTTCTCTCCACTGCGAATTTGCTCTCATGATCGATACGGATAGAGATAAATCTAATGAAGAATTGTTGACGAGAATAATTTTGAGGATAAGTCGAGCATATTCAGGATGCGGTGAACGGCCTGCCAATCCGGGGGTGCATGTGGACAAGGTGCTACATGAAGTTAGGATCACTATAGATGAATACGGCACGGAGGCGGTGGCGGCCTCGGGCGGGTTCTGTCTCGCACGGCGGAGCAGTTCTATGTGGACTCCCCCTTCTACATGTTTCATCAGGGACGAGAGCACCAAAGTACCTTCAGCGCCGCCATTTTAACTCTAATCTATAG                                                                                                                                                                                                                                                                                                                                                                                                                                                | MDWRSRVFLFLMFISVAISEHEENTTDPSVTDQPHEQQLS<br>NTINELGFKLLTEEMKRYADTNIVMSPTGIAGLLAMVLLGSA<br>GNTYTELAAALGFSQDILRNRAHHEQFGSLLQLLNSSTTYA<br>DAILVEPRTRIRPLYREFLQRVYQGDARAVEFTDAPLARDTV<br>NDWIKNHTKGKIEEFLKEPLPVETRVVLLSALYFSGQWTHP<br>FLPEHTKKMAFKTPTGDVMADMMLNFGHFQYTYS AEDG<br>VQMIALPYKDNTTTMYVLKPLKLSLQDLM SRLNYSRIDQL<br>ISNMTNDRAVIRFPKMDLKNSIQLED SLK SIGLSEMFSP<br>TANFALMIDTDRDKSNEELLTRIIFEDKSQHIQDAVNGLPNPGVH<br>VDKVLHEVRITIDEYGTEAVAASGGFLSRTAEQFYVDSPFYM<br>FIRDESTKLVTFSAAIFNP NL                                                                                                                                                       |
| CpSPN14 | chr2 | ATGAGACGCGCCGTTTTTTTTGATAAGTTTTTGCTGTACTCGTTAGCGAAGAACTGCGATGAGCGGTCCGTTACCGCGTACTACAAAAAGCCTATTTATGAGTTCTCAACCGGGCTTTTGGACAGAGTTTTCCCAAGAAACGGATGGTCATTTCTGTCTGTTACCGATAAATCCGTGGCTGCAGCTCGTGAACTCGCACAGGGCGCCCATGGAGTACCCTCAAGCAGATCTGGAAGGTGACCGGACATGGGAAGCCATGTATGCAACGGACTTTGAGAAAAACCTGAACAGCTTATACGGGGAAGGGAAGGACTATAAATGCCAAAGTTAGTGATAATAGATAAATATTTAGCAGTGAAAAATTATTTTAAAGAGAGTTGAACGATCAAAAACAGTTAAAGTGGCATCTTTAGATAGAGATACTCCTTATGACTCTGCAGATGAAGCTAGTGAAATTATAGAAAGAGCTACTGGTGTTGGGAATAGTATAGACCCATTCGAGTTCAAGCTGACTTCTCTGATGTTGGCTGATGTGGCCACGTTTAAAGCTGCTTGGCGGCAACCTTCGATCCTGGATTCACTGCTGTACAGCCTTCTACCACGGAACGTTAACTGGGCGAAGTCAATATGATGTCCAGCATAGGATACTTCAACTACATTAACCTTAACAGCCATTAATGCCGAAGTTTGGAACTCCATGCATTGACAAAAGGCGTTCTATGCTCATATTTCTACCCACAAACGGAACCATCAAAGATTTATTTTCCACATGAAACGAATAAGGATAGCTACTATTTTCAATCTTTTCAAGAAATCCAAAAGCAAATTAGTGGTTTAAAGATTGCCTAGGTTTAAAGATAAGCAGTGAAATTGTGAACTTACCGGAGCTGATCAGCGATATGGGGGTGTCGTATATTTTAAAGATTAAACGGTAATCTTAAAGGTATAAGTGATTCCCGATACGAGTGAATAGGATGAAGCAAGTGGTGGAGATAGAGGTGACAGAGGAAGGTGTGGCGGCTGATATAGTTCAAAATCTAATTGATCCGGAAGTGGAACCGATGAAGTTTGAGGC                                                                                                                                                                                                                                                                                                                                                                                                                                                                                                                                                                                                                                                      | <u>MRRAVFLISFCCYSLAKN</u> CDERSVTAYYKKPIYEFSTGLLD<br>RVSQETDGHFVCSPINPWLQLVNLAQGAHGATLKQIWKVTG<br>HGKPCMQRTRLRKTLSLYGEGKDYKQSLVII DKYLAVKNYF<br>KRRVERSKTVKVASLDRDTPYDSADEASEI IERATGVGNSID<br>PFEFKLTSLMLADVATFKAAWRQFPDPGFTAVQPFYHGNV<br>KLGEVNMMSIGYFNINLTAINAEVLELPCIDKRRSMLIFLP<br>TNGTIKDLFFHMKRIRIATIFNLFKSKSKLVLR LPRFKISSEI<br>VNLPELISDMGVSYIFKINGNLKGISDFPIRVNRMKQVVEIE<br>VTEEGVAADIVQNLIDPEVEPMKFEANRPFAFMLVDKPT EII                                                                                                                                                                                                                  |

|         |       |                                                                                                                                                                                                                                                                                                                                                                                                                                                                                                                                                                                                                                                                                                                                                                                                                                                                                                                                                                                                                                                                                                                                                                                                                                                                                                                                         |                                                                                                                                                                                                                                                                                                                                                                                                                                                                        |
|---------|-------|-----------------------------------------------------------------------------------------------------------------------------------------------------------------------------------------------------------------------------------------------------------------------------------------------------------------------------------------------------------------------------------------------------------------------------------------------------------------------------------------------------------------------------------------------------------------------------------------------------------------------------------------------------------------------------------------------------------------------------------------------------------------------------------------------------------------------------------------------------------------------------------------------------------------------------------------------------------------------------------------------------------------------------------------------------------------------------------------------------------------------------------------------------------------------------------------------------------------------------------------------------------------------------------------------------------------------------------------|------------------------------------------------------------------------------------------------------------------------------------------------------------------------------------------------------------------------------------------------------------------------------------------------------------------------------------------------------------------------------------------------------------------------------------------------------------------------|
|         |       | AAACAGACCGTTTGCTTTTATGTTGGTAGATAAACCGACAGAAATCATATTATTTGCTGGAGTATACTCTATCCCATCAGTGTTCTAA                                                                                                                                                                                                                                                                                                                                                                                                                                                                                                                                                                                                                                                                                                                                                                                                                                                                                                                                                                                                                                                                                                                                                                                                                                                | LFAGVYSIPSVF                                                                                                                                                                                                                                                                                                                                                                                                                                                           |
| CpSPN15 | chr22 | ATGGATCCGAAATTATCGCTAAGTCTTTGGAATTTGCGGCGAGGTTTGCATGAGCTGGAGAAGGGTAAAAGTCAGGTGTGCTCCCCGTTGTCGGCGCAGGCGGTGCTGGCGCTGACGGCGCTCGGCAGCGGTGGCGACACCCGCAAGGAGCTGCTGCAGGCCATGGCGCTACCCGATGATGAGGCGATTGCTCCTTATTTGGCTATTTAACATCCACTCTAAATTCAATCCAAA<br>CAGTCAAGCTGCGTTTCGCCAACAGAATATACGTGTCGAAGCATGGAACCTCTGAAACCTGGCATCCAGAAGGACTCAGTAGAAGTCTTCGGATCTAGTCTGCAGCAGGTGGACTTCATG<br>GAAAAAGGAGGGTGCCGCAGATAGTATTAATAAATGGGTAGCAGCAAAGACCAACAATATGATCAGAAACATAGTCTCTCTAACTCGTTGCACTACGCCACCCGTTTGTTGCTGGTGAAC<br>GCCATCTACTTCCAGGGAACCTGGGAAAAGCCGTTTAAAAAGGATTTAACGAAAGAAAGGATATTCCATGTAAATAATAGGGACACAGTCGAAGTTCCTATGATGTTTATGGATGAGGAA<br>TATTTTCGGTACAGACACAGTCTAGAGTTGAAAGCACAACTCCTGCAGATGAATTACAAAGGCCGTCGAAGCAAGCATGATACTAATAGTACCAGACGCAGTCGAAGGTCTGGGAGCCAT<br>GCTGCAGCAGCTCTCAGACCACGACCTGATGGATGAAGTGGCTGTGATGAGGGCCACCAGGATAGAAGTCATGATACCAAGTTCGAAGATAGAACTGATATCAACCTGGAGGAACTGT<br>TACCAAGATGGGAATCCATGATATATTCGATCAAAACAAGTCAGACATTGCAATGTTTACATCTCATGACAGGATGTGCGTGACGCAAGCCATCCAGAGGGCCGTCATCGAGAATGAGA<br>CGGGAAGTGAAGGCTGCAGCCTGCACACTAACCGCTATCAGCGAAATCTGCGCCGTCATAGAACTGGAACCTCCGAAGCGTTTTGTGGCAGACCGGCCGTTTCTGTATTTGCTGCTGGCG<br>CGTGGTGTACCCACCTTCATAGGCGTTTACCATCAGTAG                                                                                                                                                  | MDPKLSLSLWNFAARFCNELEKGKSQVCSPLSAQAVLALTA<br>LGSGGDTRKELLQAMALPDDEAIRSLFGYLTSTLNSIQTVKL<br>RFANRIYVSKHGTLKPGIQKDSVEVFGSSLQQVDFMEKEGA<br>ADSINKWVAAKTNNMIRNIVSPNSLHYATRLLLNVNAYFQG<br>TWEKPFEDLTKERIFHVNNRDTVEVPMFMDEEYFRYR<br>HSLELKAQLLQMNYKGRQASMLIVPDAVEGLGAMLQQLS<br>DHDLMDEVAVMRATRIEVMIPKFIETDINLEELLPKMGIH<br>DIFDQNKSDIRMFTHSDRMCVTQAIQRAVIENETGTEAAA<br>CTLTAISEICAVIELEPPKRFVADRPFLYLLLARGVPTFIGVYH<br>Q                                                     |
| CpSPN16 | chr2  | ATGAAGACCATAGTTTTCTACTATTTGTGCGGACATGTTATGCTGAGGAGTTTAGTGCGCGATCAAGAACTTCAGCATCGAACTTTGCATCATACACAGAAACAACTGGTGGACATG<br>TTGTAATATCGCCTTTTGGAAATATGGACCCTAATGACCGGAGTCGCGCTCGGTGCAACAGGCAACAGTTTCGCGGAGTTGCAACGCGCTTTCATCCTCCCAAGGAGCAAGAAAACCGTTA<br>TTGCCGTTACAAAAGATTGACAAAAGCCGTGCTAAATCCATCCACAAACGGAGTATCACTAACAAGCAAAAACCTTTGTATTATTGACGACGATTTCACTTTGAATCCGGACTTTTCGGAA<br>AACGATTAGCACAGATTTGACGCAACAATAAAAGTACTCGATTTTAAGAATCCTGACCTGGCGGCCGGCAAAGCGAACAATTTTATCCAAAATTCGGGGGGGCGAGTCTCTAACGTGCT<br>AACCTCAGATGACTTTGCTGAGTCCAGGATGATTTTAACTAATGTGATATCCTTTAAAGGCTTATGGTTATCTCCCTTCAACACGAGCGAAACAACAGTTGAGAACTTTTACAATGAAAACA<br>ATGATGTCGTAGGGCAAGTCAACATGATGTATCAGAGAGCGGAGTTTCCATTCTCCAATATCGTTGAACTAAAAGCGTTTGTGTGCAATTGCCGTACGGAATGATGGAAAATATGCTAT<br>GCTGTTAATTCTGCCACATCCCCGAGTAAAGTTGGACGATGTCTATAGAAGGCTAGCGAATGTGACTCTTACAGAAATAACAAAGAAGCTACAGAGCGATATAGACGAATACGGAATGAC<br>TGATGTTGACATTAACTTCCAGATTCAAGATTAGTACGAATGTTGTTATGAACAAGCCCTTAAATGACATGGGTGTTTACGACATTTTCAACCAGATGTCGCGAGTTTCAAACGTGTGA<br>CGAATGAGAATATTTATGTCTCGGCCATTGTGCACAAAGCTGACATTGAAGTCACTGAACTGGGACAGTAGCCTCTGCTTCGACTTCGCCAATTTCCCGGATAGGATATCGACGCCACT<br>TATGAGAGCCAATAAGCCTTTTGCCTACTTTATTATTGAGAAAACTACCACGACTGTTATATTTGGTGGCATATATTCGAAACCTACTGTTTATTAA                                                                              | <u>MKTIVFLLFVATCYAE</u> EFSARSRNFSIELLHHTQKQTGGHVVI<br>SPFGIWTLMTGVALGATGNSFAELQRAFILPRSKKTVIAGYK<br>ELTKAVLNPSTNGVSLTSKNFVIFDDDFTLNPDFRKTTISTDFD<br>ATIKVLDFKNPDLAAGKANNFIQNSGGRVSNVLTSDFAES<br>RMILTNVISFKGLWLSPFNTSETTVENFYNNENDVVGQVN<br>MMYQRAEFPSNIVELKAFVVELPYGNDGKYAMLLILPHPR<br>VKLDDVYRRLANVTLEITKKLQSDIDEYGMTDVIKLPFRKI<br>STNVVMNKLNDMGVYDIFQPDVASFKRVTNENIYVSAIV<br>HKADIEVTETGTVASASTSANFADRISTPLMRANKPFAYFIE<br>KTTTTFIFGGIYSKPTVY                      |
| CpSPN17 | chr15 | ATGACATCGATTTCTCACGTAGCGAATTTGCGGGCGCGGTTCTGCAATGAACTGGACAACAGCAAAAACCTTCATCTGCTCTCCTCTGTGCGGTGGAGACGGTGTGGCATTAGTGGCCCTC<br>GGCAGCAGCAACGAATCTCGCGCAGAAATATTCAAGGCGCTCGACATCCCTAATGAAGACGATCTCTTTTCCACATTCTATCCCTGACAACAACCTCTAGCTTCGAAGCCTTCAAAACATA<br>AAACATCCAACGACGTTACGTTAAAAATCGCGAACAAGATCTACGTGAAACAGGGGGCAGCCCTAAAGGCGGCTCTCAAGAAGAAGCCGAAGAAGTCTTCAAGCCAGTTTGGAAAC<br>AAATAGATTTTACACAAAGTAATAATGCTGCGAATGCCATTAATAATGGGTGTCAATCAAACCAACAATACTATTAAAGACATTGTTTCTGCCGACATGCTCGATGAAGACACACGACTA<br>GTACTCATCAATGCCATCTACTTCCACGCTTTCTGGGAGTATCAATTTGACGCCGACGATACATACACCAGAGTATTTATGTCAATAAATCGAAGAAAATCGATATTAACAGATGAGTTTA<br>ATGGGAAAACCTTTTAATTACAAACACAGTCCCGAGTTAAAGGCCAAAATACTGCAGATGTTCTACGTTGGAGGTGAAGCTAGTATGGTGATAGTTCTGCCAGATGAAATCGAGGGTCTA<br>AGTGCTGTGATGAAACAACCTGGCAACCGGGTATGATCTGATGGCAGAGATCAAAAGCTACAAAAAAAACAACCTCAAGTAATCATACCTAAGTTTAAAATTGAATCGGAGATCAATCTG<br>AAGGAACTGTTACCTAAGGGTACCTCCCTACACGTAAAGTGGGGGTGAATATCTTTTTTGTGCAACCTACAGTGTGGGGTATCGTTGGAAAGATGGGAATCAAGGCAATTTTGTAT<br>CCAATTAAGTCAGAGGTCAACATGTTGTCAAGTGATGATCGACAATTTGTATCCCAAGCCATTCAAAGGCCCTTCATCGCGGTGGATGAACTGGGCACGGAGGCGGCAGCAGCCAGTCT<br>TCTCACTACATGGCCGTACCAGCGCAAGCGCGATTCTACGACTTGTCTTGATCGGCCCTGATCTTATATGTAGATTCCGTGGATGTAGACATTAGGCACTTTATCGAACATGGTCACTCCTG<br>CGGCCTACCTGAGCATCCGCATTTCCACCACATGAACTCTGTTCACTGTAA | MTSISHVANFGARFCNELDNSKNFICSPLSVETVLALVALGS<br>SNESRAEIFKALDIPNEDDLFSTFISLTTLASKPSKHKTSNDV<br>TLKIANKIYVKQGAALKAALKKNAEEVFQASLEQIDFTQSN<br>NAANAINKWVSNQTNNTIKDIVSADMLDEDTRLVLINAIYF<br>HAFWEYQFDADDTYTRVFHVNSKKIDIKQMSLMGKPFN<br>YKHSPELKAKILQMFYVGGEASMVIVLPDEIEGLSAVMKQL<br>ATGYDLMAEIKSLQKKQLQVIIPKFKIESEINLKELLPKGTSPT<br>RKVGVNIFCCNPTVWGIVGKMGIKAFIDPIKSEVNMLSSD<br>DRQFVSQAIQKAFIADDELGTEAAAASLLTWPYQRKRDST<br>TLSCIGLILYVDSVDVDIRHFIEHGHSCGLPEHPHFHHMNSV<br>QL |
| CpSPN18 | chr15 | ATGGTGAAATGGGGACGGAGGAATAAGGTTGTGCAGTTCTCGGCACACTCTCCGAAATGTATCCTGAATTGGACAGCAACAAAAACCTTCATCTGCTCTCCTCTGTCCGTGGAGACAGT<br>GCTGGCACTGGTGGCCCTCGGCAGCAGGAACGACTCACGCGAGGAAATATTCAAGGCTCTAGACATCCCTAATGAAGATAATCTTCGTTCACTGTTTACGTCTGTACACAAAATCTGAA<br>GAAACCATTCATAGAATCTCTCACATCAAACTCAATCCTTTTAAATCGTGACTCCACCCTCCAATCGCTACCAAAATCTACGTGAAATGTGGAAAATCTGTGAAACCGGAGCTTAAGAAAG<br>ATGCTGAAAAAGTTTTCAATTCCAGTTTGGAACAGATAGATTTTGTAAAAGTTCTGATGCAGCAAATCCATTAATAATTGGGTGAAAAAACGAATAACAATATTATTAAGGACTTAGTT<br>TCTGCCGACATGCTGGACGGAGACACAGGACTTGTGCTAGTAAATGCAATCCACTTTCACATTTTGCAAATGCCCTATGTGGGAGGAGAAAGCTAGTATGGTGATAATATTGCCTGATGAAA<br>TTGAGGGCGACACAGGTAGCGTGACTGATTTGGTGAAGAACTGGCAGCTGGATTTGACCTGATGTCAGAGATCAAGCGTCTGAAAAAACAGATCTTCAAGTAAAAATACCGAAGTT<br>TAAAGTTGAACTGAGATAAATTTGAGGGAATTACTGCCGAAGATGGGAATCCAGACGATTTTCGATAAGAATAAGGCAGAAATTAACATGCTCTCTTCTAACGATCCACTACATGTATCA<br>GAAGCTATTAGAAAGCTTTCATCACAGTGGATGAGAAAGGAACGGAAGCGGCAGCAGCTAATGAAATTACGTTGCAATTATTATGCTTGCGATGGTGGATGGGTGAAACGTTTATAGC<br>AGACCACCCCTTCTCTACATACTTCTGGCTCAGGAGATACCTATATTTTACGGAATTTTTCATGGAAATGAAACTTCGCTGTAG                                                                                                                                                                                                                          | MVKWGRNRNKVVQFLGTLSEMYPELDSNKNFICSPLSVETV<br>LALVALGSRNDSREEIFKALDIPNEDNLRSVFTSVTQNLKKPF<br>IESLTSKLNPFNRDSTLQIATKIYVKCGKSVKPELKKDAEKVF<br>NSSLEQIDFVKSSDAANSINNWWVKRTNNIIKDLVSADMLD<br>GDTGLVLVNAIHFHILQMPYVGGEASMVILPDEIEGDTGSV<br>TDLVKRLAAGFDLMSEIKRLKKTDLQVKIPKFKVETEINLREL<br>LPKMGIQTIFDKNKAENMLSSNDPLHVSEAIQKAFITVDEK<br>GTEAAAANEITLQLLCLRWWMGETFIADHPFLYILLAQEPI<br>FYGIFHGNESL                                                                              |
|         |       | ATGACATTGCATGTGAATCATGTGGCGAATTTGCGGGCGCGATTTTGCATGAATTGGATAGCGAAAAACCTTTATCTGCTCTCCTCTGTCACTGGAGACGGTGTAGCATTAGTGGCCC                                                                                                                                                                                                                                                                                                                                                                                                                                                                                                                                                                                                                                                                                                                                                                                                                                                                                                                                                                                                                                                                                                                                                                                                                  | MTLHVNVHANFAARFCNELDSEKTFICSPLSVETVLALVALG                                                                                                                                                                                                                                                                                                                                                                                                                             |

|         |       |                                                                                                                                                                                                                                                                                                                                                                                                                                                                                                                                                                                                                                                                                                                                                                                                                                                                                                                                                                                                                                                                                                                                                                                                                                   |                                                                                                                                                                                                                                                                                                                                                                                                                                   |
|---------|-------|-----------------------------------------------------------------------------------------------------------------------------------------------------------------------------------------------------------------------------------------------------------------------------------------------------------------------------------------------------------------------------------------------------------------------------------------------------------------------------------------------------------------------------------------------------------------------------------------------------------------------------------------------------------------------------------------------------------------------------------------------------------------------------------------------------------------------------------------------------------------------------------------------------------------------------------------------------------------------------------------------------------------------------------------------------------------------------------------------------------------------------------------------------------------------------------------------------------------------------------|-----------------------------------------------------------------------------------------------------------------------------------------------------------------------------------------------------------------------------------------------------------------------------------------------------------------------------------------------------------------------------------------------------------------------------------|
| CpSPN19 | chr15 | TTGGCAGCAGTAACGAATCTCGCGCGGAAATATTCAAAGCTCTCGACATCCCTAATGAAGATAATCTTCGCTCTGTGTTTACGTCTCTCACCCAAAATTTAAAGAAGCCATTTCATCGAAACC<br>ATTACATCAACTTTAAACCATTTCAGCCAGGAGTATACACTTAAAATCGCCAACAAAATCTACGTGAAACAAGGAAAAGATCTAAAATCTAATTTTAAGAAGGATGCTGAAAAAGTCTTCA<br>ATGCTAGTTTGGAGCTAATCGATTTTGGCAAAAATGATGATGCAGCTAATTCTATTAATAACTGGGTAGCGAAACAAACAAATGATATTATTAAAGACATCGTTTCTGCTGACATGCTGATGC<br>AAGACACACGGGTTGTGTTAGTGAATGCAATCTACTTTCACGGTTTTTGGGAAATTCATTCAAAGCGAACGCCACATTTACCGAAAAATTTCAAGTCAATAGAACCAAAAGTGTAATG<br>TCAAAATGATGACCCTGGAAGGACCAAGCTTCAATTACAAACATAGTCCAGAATTACAAGCTAAAAATATTGCAAATGTTTTATAAGGGAGGTGAGGCCAGTATGGTGATAGTACTGCCAGA<br>TAAGATCGAGGGTGAGACAGCGGGCGTAGGTGGCCTGATGGAACGACTGATAGCCGGGTATGACCTGATGGCAGACATTAAGAGTCTGCAAAAAACACCTCTCAAAGTAATCATACCG<br>AAGTTCAAAGCTGAAACAGAAATAAATTTGAAGGAACTTCTGCCAAAGATGGGAATTAAGGCAGTTTTCGATATGAATAAGGGAGATACAACCATGCTCTCATCTGATGAGCCACTCTAC<br>GTATCGGAAGCCATCCAGAAGGCCTTCATCTCGGTGGATGAGGCAGGAACGGAAGCTGCAGTCTGCTACTCAAATGGTCCGACGTCGTCTCTGCGGCCACTGGTGACCGGGCGAGACTT<br>TCGTTGCAAACCGTCCCTTCTCTACCAACTTACAGCTCGCGAAATTCCTATATTCTATGGAACTTTCTATGGAAATGGATATTCACAATAA                                                                                                   | SSNESRAEIFKALDIPNEDNLRSVFTSLTQNLKPFIIETITSILK<br>PFSQEYTLKIANKIYVKQGKDLKSNFKKDAEKVFNASLELIDF<br>GKNDDAANSINNWWAKQTNDIKDIVSADMLMQDTRVVL<br>VNAIYFHGFWEIPFKANATFTEKFQVNRKTSVNVKMMTLE<br>GPSFNYKHSPELQAKILQMFYKGGQASMVIVLPDKIEGETA<br>GVGGLMERLIAGYDLMADIKSLQKTPLKVIIPKFAETEINLK<br>ELLPKMGIAKAVFDMNKGDTTMLSSDEPLYVSEAIQKAFISV<br>DEAGTEAAAATQMVRRRLCGHWWTGETFVANRPFLYQLT<br>AREIPIFYGTFYGNYSQ                                       |
| CpSPN20 | chr1  | ATGTTTCAGGAAAACACTAGATCAAGTTGAACGTAAGTTTTATTGTGCGGCATTTAATAAGTTGACCGCTATTAGTCCAGACAATCGGAAAGAAAACGGGATTAGCTTTTTACAATCAGGGC<br>TTTTCTTATACCACCTGCTGATGTCGCTGTCTCTTACAATGGATCAAAACGCAGTTCGAGAAATAGAGAATATTTTGGCTTAAATATGTGCGAAGCAGACAAAATCGAGATTTTAGAACGA<br>ACAGTATCATGGCTTCCAAAATCCAGCGAAGAGCTGAAATTCGGGTGGTCTGTCGCGGTGGTGTGTCAGCGGGTGGCAGCTGGAACCGGGCTCCACGGCGCCGCCGCGCGCTTCTG<br>CCGCTGCGCCTGAGCTGGCTCGTCGGAACGAACTTCTACACAACCTTGCCGAAACCTTAACAGTATGGTGTGTGCGGACTCCGGAGGCAGCATGCACGACACGTTCTCGGAGGAGG<br>AGGTGGAGGCGGGCGTGTGCGCGGCGGCGCTGGGCACGGTGTACCTGCGCGGCAGTGGCGCACGGCGCTACGCTGTCTCAACGACACGCTGCCCTCCGCGACTCGCCCGCCGCG<br>CCCAACCGCTCGTCGCGCTACTTTGCCTCAACGACCTCATGGCTTACTCCTACTTGACGAATGGGACACAGAGGCCATAGAGATACCGTACGCTACGCCTGGCCTCACGCTACTCATCC<br>TGGTGCCGAAAGAGCTGTCGCTGCGGCCGTTGGTGAGCGCGCGGCCGCCGTGGGGCTGGACGCCGTGGTGGCGTTATGCACACGATGAGGATAGCCGTCACACTACCGCTCTATAC<br>GTTGCGCATGACTTTATTGCTGCCTAATAAACTACAAGATATGGGTATGCAAAGTTTGCTAACGAATGGCACCGACTGTCAGCCTGTGAGGCTGTCCCACGCCGTACAGCGTCTCATGTTC<br>TGGGCAGAAGCTGGTCGAAACGCGTTCAAAGACGATGGTATAGAATGGGACCCGCGTCCAGAATTGGAAATTGCTGTAGACCGTCCATATCTGTTCTTCGTTCTGTTGAATAACGTAACC<br>ATTATGAATGGAGTATTCGTACTGTGA                                                          | MFRKTLDQVERKFLLSAFNKLTAISPDNRKENGISFLQSGFL<br>YHLLMSLSLTMDQNAVREIEEYFGLNMSEADKIEILERTVS<br>WLPKSSEELKFRWSSRLVLQ RVAAGNGLHGAAARVLPRLS<br>WLVGNETSTQLAETLNSMVLSDSGGSMHDTFSEEEVEAG<br>VCAAALGTVYLRGTWRTAPTLLNDTLPFRDSPAAPNRRSRY<br>FRLNDLMAYSYLHEWDTEAIEIPYATPGLTLLILVPKELSLRPL<br>VERAAAVGLDAVVGMHTMRIAVTLPLYTLRMTLLLPNKL<br>QDMGMSLLTNGTDCQPVRLSHAVQRLMFWAEAGRNA<br>FKDDGIEWDRPELEIVDRPYLFFVRWNNVTIMNGVFVL                         |
| CpSPN21 | chr15 | ATGACATCGATTACGTTGCGAATTCGGGGCGCGGTTCTGCAATGAACTGGATAAAAAACAAAACCTTCATCTGCTCTCCTCTGTCGGTGGAGACGGTGTGGCGTTAGTGGCCCTCGGC<br>AGCAGCAACGAATCTCGCGCAGAAATATTCAAGGCACTTAACATCCCTAATGAAGACAATCTTTTTTCCACATTACATCCCTGACGGCAACTCTAGCTTCGAAGGACCCGTCAGAATTTA<br>AAACATGTGAAGACGTTACATTAAAAATCGCGAACAAGATCTACGTGAAACATGGAGGAGCCCTAAAGGCGGCTCTCAAGAAGGACGCCGAAGAAGTCTTCCAAGCCAGTTTGGAAACA<br>AATAGATTTTACACAAAGTAATAATGCTGCGAACGCCATTAATAAATGGGTGTGCAATCAAATAACAATACTATCAAAGATATTGTTTCTGCCGACATGCTCGATGAAGACACACGGCTTG<br>TACTCATCAATGCTATCTACTTCCATGCTTTCTGGGAGTATAGATTTGACGCCGACGATACATGCACCAGAGTATTTCATGTTAATAACTCCAAGAAAATCGATATTAAACAGATGAGTTTAAT<br>GGGAAAACCTTTTAATTACAAACACAGTCCCGAGTTAAAGGCCAAAATACTGCAGATGTTCTACGTTGGAGGTGAAGCTAGTATGGTGATAGTTCTGCCAGATGAAATCGAGGGTCTAAG<br>TGCTGTGATGAAACAACCTGGCAGCCGGGTATGATCTGATGACAGAGATCAGAAGTCTACAAAAAAAAGAACTTGAAGTAATCATACCTAAGTTTAAATTTGAATCGGAAATCAATCTAAA<br>GGAAC TATTACCTAAGATGGGAATCAAGACAATTTTTGATCCAATTAAGTCAGAGGTCAACATGTTGTCAAGTGATGATCGACAATTTGTATCCCAAGCCATTGAGAAAGCGTTTCATAGCA<br>GTGGATGAACTGGGCACGGAGGCGGCAGCAGCCACATCGATGTGGCAACGAGAACGCTGCGGCCATTTTTGGACCGGCGATACGTTACGGCGGACCGCCCCCTTTCTCTTTCTACTCC<br>AGGCTCATGAGATCCCTGTATTTTATGGAACTTTCAATGGATCAGACATCATTTTCTTTAAATAT | MTSIHVANFGARFCNELDKNKNFICSPLSVETVLALVALGSS<br>NESRAEIFKALNIPNEDNLFSTFTSLTATLASKDPSEFKCEDV<br>TLKIANKIYVKHGGALKAAALKDAEEVFQASLEQIDFTQSN<br>NAANAINKWVSNQTNNTIKDIVSADMLDEDTRLVLINAIYF<br>HAFWEYRFDADDTCTRVFHVNNSSKKIDIKQMSLMGKPFN<br>YKHSPELKAKILQMFYVGGEASMVIVLPDEIEGLSAVMKQL<br>AAGYDLMTEIRSLQKKELEVIIPKFKIESEINLKELLPKMGIKTI<br>FDPIKSEVNMLSSDDRQFVSQAIQKAFIADDELGTEAAAAT<br>SMWQRRERCGHFWTGDFTADRPFLFLQAHEIPVFYGTFN<br>GSDIIFKY |
| CpSPN22 | chr5  | ATGTCAGCAATGTCGGTGTTCACTCCGATAGCCGAGCTTTGTCTGTACACGGAGGACGGTCCCGCCTTTGATCAGTGCATCAAAATACTTAACTTGAAGGACAAAAAAGATATCCGAGAT<br>ACCTTTGCCAATTTCTCCTCTTATACGAAGGTGTGACCAAGTGTTAACTTTTCCACTGCCGCCAAAGTGATTCCAGTGAGAAATACGAGCTGAGCGTGTTTCATAAAAGATGCCATTG<br>AAGTCTTCCACGCCGAGCACAAAATCTTGATTTTAGCAAAAACGTTGAAGCTGCAGCTATAATGAATGCCTGGGTTGAGAGTCAAATAACAATCGTATTAAAGATTTAGTTACACCAGA<br>TATGATAAGTGCATTAACAAGACTTGACTCATCAATGCTATTTACTTCAAGGGTAATTGGCTTTACAGATTTAACGAACTAATACGAAAGAAGAAGATTTCTATCTAAGTGATGGTTCAAC<br>TGCGAAAGTAAAGTTGATGTATCAAGAGATTAATGATCTTGAGTATGGAGAAGTTCCTTCTTAGACTGCAAGGTGGTTGCAATCCTTTTACTGCGAAAGAAAGCTCCGCGATCATTATT<br>TTGCCAAACAGCATTAAACGGCACAATGCAATTGGCGAAAGACCTGCAAAATACAGCGAATTGGAAAAAAGTCATAGATAGCCTTTATCCTCAAAAAGTGAAACTGTATTTACCAAAGTTT<br>GTCATTAGTACAAC TACAGACTTAAAGGTTTTGTTACAGAAGTCTGAAGTTAAGTTAATGTTTTATGTCATTATGTGTGATGTAAGTCTGGCCACAGACAGTTAG                                                                                                                                                                                                                                                                                                                                                  | MSAMSVFTPIAELCLYTEDGPAFDQCILNLKDKKDIRDTF<br>ANFSSLYEGVTSVNFSTA AKVVSSEKYELSAGFIKDAIEVFHA<br>AAQNLD FSKNVEAAAIMNAWVESQTNNRIKNLVPDMIS<br>ALTRLVLINAIYFKGNWLYRFNETNTKEEDFYLSDGSTAKVKL<br>MYQEINDLEYGEVPSLDCKVVRILYTGKESSAIILPN SINGT<br>MQLAKDLQNTANWKKVIDSLYPQKVKLYLPKFVISTTTDLK<br>VLLQKSEVKLMFYVIMCVVTLATDS                                                                                                                       |
| CpSPN23 | chr15 | ATGTCCTTCTGTTCTGCAGGAAAACAAGATTTGAGGAGATTGCTCTTTTCCACATT CATATCCCTGACAACAAC TCTAGCTTCGAAGCCTTCAAAACATAAAACATCCAACGACGTTACGTT<br>AAAAATCGCGAACAAGATCTACGTGAAACAGGGGGCAGCCCTAAAGGCGGCTCTCAAGAAGAACGCCGAAGAAGTCTTCCAAGCCAGTTTGGAACAAATAGATTTTACACAAAGTAAT<br>AATGCTGCGAATGCCATTAATAAATGGGTGTCAAATCAAACCAACAATACTATTAAAGACATTGTTTCTGCCGACATGCTCGATGAAGACACACGACTAGTACTCATCAATGCCATCTACTTC<br>CACGCTTTCTGGGAGTATCAATTTGACGCCGACGATACATACCAGAGTATTTCATGTCAATAAATCGAAGAAAATCGATATTAAACAGATGAGTTTAATGGGAAAACCTTTTAATTACAA<br>ACACAGTCCCGAGTTAAAGGCCAAAATACTGCAGATGTTCTACGTTGGAGGTGAAGCTAGTATGGTGATAGTTCTGCCAGATGAAATCGAGGGTCTAAGTGCTGTGATGAAACAAC TGG<br>CAACCGGGTATGATCTGATGGCAGAGATCAAAAGTCTACAAAAAAAACAAC TCAAGTAATCATACCTAAGTTTAAAATTGAATCGGAGATCAATCTGAAGGAACTGTTACCTAAGATGG                                                                                                                                                                                                                                                                                                                                                                                                                                                         | MSFCSAGKQDLRRLLFSTFISLTTTLASKPSKHKTSNDVTLKI<br>ANKIYVKQGAALKAAALKNAEEVFQASLEQIDFTQSN NAA<br>NAINKWVSNQTNNTIKDIVSADMLDEDTRLVLINAIYFHAF<br>WEYQFDADDTYTRVFHVNKS KIDIKQMSLMGKPFNYKH<br>SPELKAKILQMFYVGGEASMVIVLPDEIEGLSAVMKQLATG<br>YDLMAEIKSLQKKQLQVIIPKFKIESEINLKELLPKMGIKAI                                                                                                                                                       |

|         |       |                                                                                                                                                                                                                                                                                                                                                                                                                                                                                                                                                                                                                                                                                                                                                                                                                                                                                                                                                                                                                                                                                                                                                                                                                                                                                                                                                                                                                                                                                                                                                                                                                                                                                                                                                                                                                                                                                                                                                                                                                                                                                                                                                                                                                                                                                                                                                                                                                                                                                                                                                                                                                |                                                                                                                                                                                                                                                                                                                                                                                                                                                                                                                                                                                                                                                                                                                                                                                                                                                                                                                      |
|---------|-------|----------------------------------------------------------------------------------------------------------------------------------------------------------------------------------------------------------------------------------------------------------------------------------------------------------------------------------------------------------------------------------------------------------------------------------------------------------------------------------------------------------------------------------------------------------------------------------------------------------------------------------------------------------------------------------------------------------------------------------------------------------------------------------------------------------------------------------------------------------------------------------------------------------------------------------------------------------------------------------------------------------------------------------------------------------------------------------------------------------------------------------------------------------------------------------------------------------------------------------------------------------------------------------------------------------------------------------------------------------------------------------------------------------------------------------------------------------------------------------------------------------------------------------------------------------------------------------------------------------------------------------------------------------------------------------------------------------------------------------------------------------------------------------------------------------------------------------------------------------------------------------------------------------------------------------------------------------------------------------------------------------------------------------------------------------------------------------------------------------------------------------------------------------------------------------------------------------------------------------------------------------------------------------------------------------------------------------------------------------------------------------------------------------------------------------------------------------------------------------------------------------------------------------------------------------------------------------------------------------------|----------------------------------------------------------------------------------------------------------------------------------------------------------------------------------------------------------------------------------------------------------------------------------------------------------------------------------------------------------------------------------------------------------------------------------------------------------------------------------------------------------------------------------------------------------------------------------------------------------------------------------------------------------------------------------------------------------------------------------------------------------------------------------------------------------------------------------------------------------------------------------------------------------------------|
|         |       | GAATCAAGGCAATTTTGTATCCAATTAAGTCAGAGGTCAACATGTTGTCAAGTGATGATCGACAATTTGTATCCCAAGCCATTCAAAAGGCCTTCATCGCGGTGGATGAACTGGGCACGG<br>AGGCGGCAGCAGCCAGTCTTCTCACTACATGGCCGTACCAGCGCAAGCGCGATTCTACGACTTTGTCTTGATCGGCCTGATCTTATATGTAGATTCCGTGGATGTAGACATTAGGCACTTT<br>ATCGAACATGGTCACTCCTGCGGCCTACCTGAGCATCCGCATTTCCACCACATGAACTCTGTTCAAGCTGTAA                                                                                                                                                                                                                                                                                                                                                                                                                                                                                                                                                                                                                                                                                                                                                                                                                                                                                                                                                                                                                                                                                                                                                                                                                                                                                                                                                                                                                                                                                                                                                                                                                                                                                                                                                                                                                                                                                                                                                                                                                                                                                                                                                                                                                                                                             | PIKSEVNMLSSDDRQFVSQAIQKAFIAVDELGTEAAAASLLT<br>TWPYQRKRDSTTLSCIGLILYVDSVDVDIRHFIEHGHSCGLP<br>EHPHFHHMNSVQL                                                                                                                                                                                                                                                                                                                                                                                                                                                                                                                                                                                                                                                                                                                                                                                                            |
| CpSPN24 | chr22 | ATGGAGCCGTCGCTCGCAGCGTCACTCTCGCATTTTCGCAGCGCGGTTTCGCGAATGAACTGGAGAAGGGTAAAAGTCAGGTGTGCTCCCCGCTGTCGGCGCAGGCGGTGCTGGCGCTG<br>ACGGCGCTCGGCAGCGGTGGCGACACCCGCAAGGAGCTGCTGGAGGCCATGGCGCTGTCTGATGATGAAGCGCTTCGTTCTTTATTCTCCTACGTAACATCTACCACGAAGTCCGTGCA<br>AGGCATCACGCTGAAGATGGCCAACAAAGTCTATGTCACCAATAAAAGCAAGCTGCAGCCAGACATCCAGAAGGATGCCGAGGAGGTGTTCCAGTCCGCGCTGGAGCAGTTGGACTTT<br>ACGGAGAGTGCAGCAGCTGCGGGGGCTGTTAATAAATGGATGGCCAACAAAGTCTACGTACCAATAAAAGCAAGTTGCAGCCAGACATCCAGAAGGATGCCGAGGAGGTGTTCCAG<br>TCCGCGCTGGAGCAGTTGGATTTTACGGAGAATGCAGCAGCTGTGGGGGCTGTTAATAAATGGGTGGCGGAGCAAACCTGAAGACATGATAAAGGACGTAGTAGACGCCAAGTCACTG<br>AACAGTGACACGCGCTGTTGCTCATCAACGCCATCTACTTCCAGGGATTTTGGGAGACACCGTTCAGGACTCGAGCCACCCGCGACCGACCGTTCATGTGGACCTCAACACGCAGAT<br>CAAAGTGCCGATGATGAGCATGCACGATGTCCACTTCCGGTACAAGCACAGCCCCGAATTGAAAGCTCAATTGATAGTAAAAAAAATATTGGGTCTAGTTTTTGACATCAGGATTCATTTT<br>CCATTCCAGTTCTCCAGATGGACTACAAAGGTCGACAGGCGAGCATGGTGATAGTCTCCCCGATGAGATCGAGGGTCTCGGAGCCGTGCTGCAGCAGCTCGCCGCCGGCCACGACCT<br>GATGGCTGAACTGACAGATATGAAGAGCACGCTGCTGGACGTCATGGTTCCCAAGTTCAAGATTGAGACGGAGATAGATTTGACGCAGCTTCTGCCTGAGATGGGCATCAAGCTAATAT<br>TCAACGATCGCTATTCAAACATCAATATGCTAACGTCCAACGAGCCCCCTCTACGTGTGCAAAGCTGTCCAGAAGGCTCTGATCGAGGTGGACGAGGCAGGGACGAAGGCTGTTGCACGC<br>ACGATGATACCCCCGAAATGCCTTGTGTATACGGAGGCCACGGAAGTTTAAAGCGGACCGTCCCTTTGTATATTTACTGGCGGCACGAGAGTTCCCGATTTTCTTGGAATCTATCAAG<br>GAAGCGAATTTGCAGTACCAGATGTGTCTGATAGTGATATTGACCAAACGAAACCGGTTAACGTCGGTGTCAAAAAGCAATTATCAAATAA                                                                                                                                                                                                                                                                                                                                                                                                                                                                                                                                                                                                                                                                                                                                                                                                                                                                                                                                                                                                                                                                                                                  | MEPSLAASLSHFAARFANELEKGSQVCSPLSAQAVLALTAL<br>GSGGDTRKELLEAMALSDDREALRSLFSYVTSTTKSVEGITLK<br>MANKVYVTNKS LQPD IQKDAEEVFQSALEQLDFTESAAA<br>AGAVNKWMANKVYVTNKS LQPD IQKDAEEVFQSALEQL<br>DFTENAAAAGAVNKWVAEQTEDMIKDVVDAKSLNSDTRL<br>LLINAIYFQGFWETPFRTTRATDRPFHVDLNTQIKVPMMS<br>MHDVHFERYKHSPELKAQLIVKKILGLVFDIRIHFPFQLQMD<br>YKGRQASMVIVLPDEIEGLGAVLQQLAAGHDLMAELTDM<br>KSTLLDVMVPKFKIETIDLTQLLPEMGIKLIFNDRYSNINML<br>TSNEPLYVSKAVQKALIEVDEAGTKAVARTMIPPEMPCCIRR<br>PRKFKADRPFVYLLAAREFPFLGIYQGSEFAVPDVS DSDIDQ<br>TKPVNVGVKKQLSK                                                                                                                                                                                                                                                                                                                                                                                       |
| CpSPN25 | chr5  | ATGGCGTTGTGAGCAAAACCTGCCCGGTCAACGAAGAATACTCCTCCTGCATCAACGGTGGATGTGGACCCAGAACTGCAGTCAGATCGACAAGTCGAGGACCTGTGTGGATCCTGT<br>CAAGTGCATTGAGGGATGCGTCTGTAAGCAGGGGCTGGTTGAGGGCCGGAAATGGAACCTGCGTACCTAAGGACCAATGCAGAACAAAAATGCGGACTAAACGAAGTGTTACAGCGACTG<br>TCCCAACCCCTGTCCGCCAGGAAGTGCAACCTCAAAAACGCAGTGTTCAAATGCAAGGCACCAACCAAGCCAGGGGATCCTGAATGCAAGCCTGGGTGCACGTGCGCTAAAACTATT<br>ACAGAAATGCGACAGGATCGTGTGTGCTGAAGGAGAACTGCGAAAAACCATTAATAATGCCAGTAAACGAACAGTATGATCCCTGCCAATGATCTGTCCGCCTCAAAAATGTGATGTCA<br>ACCCAGCTCTGATCCTGTGCCTTCCTAATCCAGAGTATGGCAATCCTAACTGTAAACCAGGCTGCATCTGCAAGAACTTAGAAGTACGGAACGATGCCGGACAATGTGTCCCGAAGGATA<br>AATGCCCAAAATGTACTGGCCAGAACGAATACTGGGAACCCCTGCATTCAAGGCTGCTCCAACCAAAACCTGCGGAAGCATCGGTGAGAAATACTACTGCCCGTTACAGAAAGGCTGCAAG<br>AGTGGCTGCAGATGCAAGCCCGATTCTACAGGAAAGATGTTGGATCACCTTGCACTCTCACAGAGGAACAGTGCACCAAAGGAAAGTGTCGCCCTGGTGAGAATTGGAACACGTGTC<br>CTGCGATCAAATGCGATGCGGATTACTGCGGAAAAAATAAAGATTACCAAAATGGTGCCGATTGGGATAGTATGTGACCCGCCAAGATGTACATGCGAAAAACAATAAAAAAGAGAC<br>AGGAAAAATGGCAAATGTATCCAGTGTTGACTGTGCAAAATGGATATCCATTACCTGAATTGAAAGCAGAAAAAGTAAGGATAGCCAATCTATCAAAAACACCATTCCCATGCCCCGCA<br>ATGAAGAGTATAAAGTTTGTCCACCACCATGCCCCGGAGAGACGTGTTCTGAGCACATTACCGGGCCGCCGGATGGGCACTGTCCGCCGAACGAGCCCGTGACTATCTGCACTCCACAG<br>TGCAGGTGTTGCAAAGGATATTCCAGAAACGATAATGGAACGTGCATACCAAGCCTTAAGGCAACACCTACAACCTACAGTAAAACCGCCTACTATCAGCACCGGTGACAGAGGCTCTGG<br>ATTAGCAGGCGTACTTGATGGCATCACAGCATTCACTGGAAAATGTCTTTATGAACGCATGCAATCTGCACCTAACGAGAACATAATAATGTCCGCCATGTCCGGTGTCACTCCGATAGCTC<br>AGCTTTGTCTCTACTCGAACGGACCCGCCTTTGATCAATGCATCAAAACACTGAATCTTAAGGATAAACAAAGACATCCGAGATACATTTGAAAATTTCTCCTCCTTATACGAAGGCGTTACC<br>AGTGTTAACTTTTCACTGCTGCCAAAGTCTATTCCAGTGATAAGTACCAGCTGAGCGATGGTTTCAAAAAGATGCCATCGATGTCTTCCACGCCGACGACAAGAGATCGATTTTCATTA<br>AAAAAATCAAGCTGCAGCTATAATGAACGCTGGGTTGAGAGTAAAACCAACAATCGAATTAAAGATCTAGTTTCACTGACATGCTAAGTGAATCGACAAGGATTGTACTTATCAATGC<br>CATTTACTTCAAGGGTAAATGGTTGAAACAATTTAATGAAAATGATACGAAAAAAGAAGATTTCTATTTAAGCGATGGTTCAACTACAAAAACCAAGTTGATGTATCAAGAAATCAAGGAC<br>CTAGAGTACGGAGAAGATGCATCTTTAGATTGCAAGGTCGTTTCAATTCTTACACAGGCGAAGAGAGCTCCGCGATAATTGTTTTGCCAAACAGCATTAAACGGCACAATGCATTGGCC<br>CAAAATCTACAATTTCCAGCAAATTGGAAGAACTCTTAGATAGCCTCTCCCCTCAAAAAGTGCAACTATATTTACCGAAATTTGTAATTAGCACTACTACAGACTTGAAGGACTTATTA<br>GAAGGCTAATATAACTAATTGGTTTAACTGCGGCAATTCTGGTTTATCCGGGCTTTTAGCCAAGCCAGAAGATATCTGCATAACAGAGGCCATTCAAAAAGCGTGGTGTGAATTCAATGAA<br>ATAGGAACAGAGGCTACTGCAGCTAATGTTGTAGTAGGCGTAGGTGGCGCCATGCCAATGCCGCCAGTGATTTAAAGCTAACCGTAGCTTCTCTTCTATATTCTACTAAAGAATGCAA<br>GCGAATTGCCCATTTTCTGTGGAAAATACGGAAATCCAAACTAA | MALSAKPCPVNEEYSSCINGGCGPRNCSQIDKSRTCVDPVK<br>CIEGCVCKQGWLRAGNGTCVPK DQCRTKCLNEVFSDCP<br>NPCPPRKNLKNVFKCKAPPKPGDPECKPGCTCAKNYYR<br>NATGSCVLKENCKPLKCPVNEQYDPCPMICPPQKCDVNP<br>ALILCLPNPEYGNPNCKPGCICKNLEVRNDAGQCVPKDKCP<br>KCTGQNEYWEP C IQGCSNQTCSIGQKYCPLQKGCKSGC<br>RCKPGFYRKDVGPSCLTEEQCTKGKCPPGENWNTCPAIKC<br>DADYCGKNKDSPKWCPIGIVCDPPRCTENNKKRDRKNGK<br>CIPVVDCRNGYPLPELKAEKVRIANLSKTPFCPRNEEYKVC<br>PPPCPGETCSEHITGPPDGHCPPNEPVTICTPQCRCKGYS<br>RNDNGTCIPSLKATPTTTVKPPTISTGDRGSLAGVLDGITA<br>FTGKCLYERMQSAPNENIIMSAMSVFTPIAQLCLYSNGPAF<br>DQCIKTLNLKDKQDIRDTFENFSSLYEGVTSVNFSTA AKVYSS<br>DKYQLSDGFKKDAIDVFHAAAQEIDFIKKNQAAAIMNAWV<br>ESKTNNRIKDLVSPDMLSESTRIVLINAIYFKGKWLKQFNEN<br>DTKKEDFYLSDGSTTKTKLMYQEI KDLEYGEDASLDCKVVRI<br>PYTGEESSAIIVLPNSINGTMHLAQLNLQFPANWKKLLDSLSP<br>QKVQLYLPKFVISTTTDLKDLLKANITNWFNCGNSGLSGLL<br>AKPEDICITEA IQKAWCEFN EIGTEATAANVVVGVGAMP<br>MPPVVFKANRSFLFYILLKNASELPFCGKYGNPN |
|         |       | ATGTACGGACAAGTACGAGCGGAATGCACTATGACTAATGACATCAATCAGATATTGGCCTCATTGGCCTGGTTCTTGAGTGATGGGCGGACGAGATGCGTGCGACACTGTGTGTGCTG<br>CTTGACAGCCACCTGCGTATTGGCTGATGAAAGCAGGGGGCTCCAAGCGTCCGTACATCGCCGACGCGGTTGGCAATACTTTGCCCCACCATCTAATGGGCCAGCGACCGTTCGGCAGCCC<br>TGTC AACCTCCTAACCCGAGACCGCTATGAGTTCTACACTTTCGATGAATCCGGAGAAGTGGTTAAACGACTCATGACTTTACAAGAAATTCAAGCCATAGTTGCGGCTGGTGAAGAAGC<br>AGAAGGACTGGTTACGTTTGCTAATGATAATCAGCCGACGATTGCATTAAATTCAGTCAACCACCTTACACTAAAGTTTCATAGCGTTGTCACTAATGTGCAGAATGTACTCAAGGCTCAAA<br>TGGAAGCTCATAAAAAACAACCACAATTGAATCCTACATTGGATACACCTGATGTGTCTGATTCTTGAGTCTAATTTTACCATCGATCTTTGGAAACACTGGAGTGCATATCGTACCAGATA<br>AGACTTCTGCATCTTTTACTACCCAGAAACAGAAACAATTGAGTTTGACCGTATTAACCTTTGATGACAATCTTAGCAAGGAAGGAAGTAACCCGATCGGAAGTTCCACTACAGTACAAAA                                                                                                                                                                                                                                                                                                                                                                                                                                                                                                                                                                                                                                                                                                                                                                                                                                                                                                                                                                                                                                                                                                                                                                                                                                                                                                                                                                                                                                                                                                                                                                                                                                                                                                                                                                                                                                     | MYGQVRAECTMTNDINQILASLAWFLSVWADEMRTL CV<br>LLAATCVLADES RGSKRPIADAVGNTLP PPSNGPATV GSPV<br>NLLTPDRYEFYTFDES GELVKRLMTLQEIQAIVAAGEEA EGL<br>VTFANDNQPTIAFNFSQPPYTKVHSVVTNVQNVLKAQME<br>AHKNKPQLNPTLDTDPVDSWSLILPSIFGNTGVDIVPDKT<br>SASFTTPETETIEFDRINFDDNLSKEGSPNIGSSTTVQNVAKP                                                                                                                                                                                                                                                                                                                                                                                                                                                                                                                                                                                                                                        |
